# Supplementary material for: Insertion of [1.1.1]propellane into aromatic disulfides
Source: PubMed Central journal article supplement (PMC6604700; doi:10.3762/bjoc.15.114), 2019-05-28

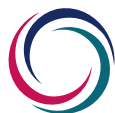

## Supporting Information

for

### Insertion of [1.1.1]propellane into aromatic disulfides

Robin M. Bär, Gregor Heinrich, Martin Nieger, Olaf Fuhr and Stefan Bräse

*Beilstein J. Org. Chem.* **2019**, *15*, 1172–1180. [doi:10.3762/bjoc.15.114](https://doi.org/10.3762/bjoc.15.114)

## Spectra

# [5a] 3-Phenylsulfanylbicyclo[1.1.1]pentane

## <sup>1</sup>H NMR

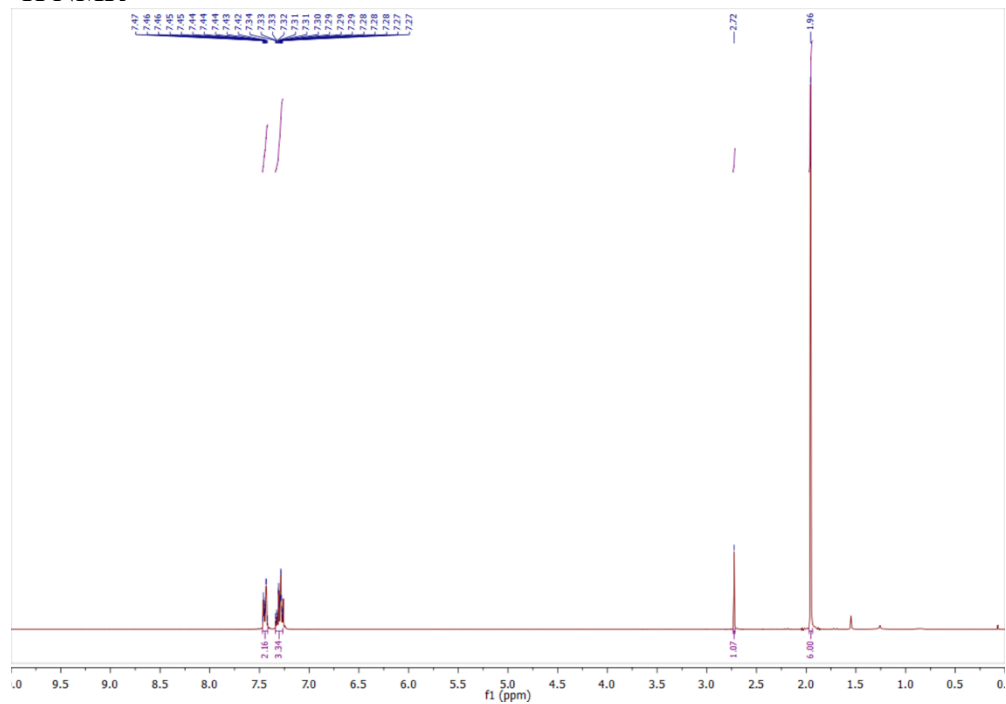

## <sup>13</sup>C NMR

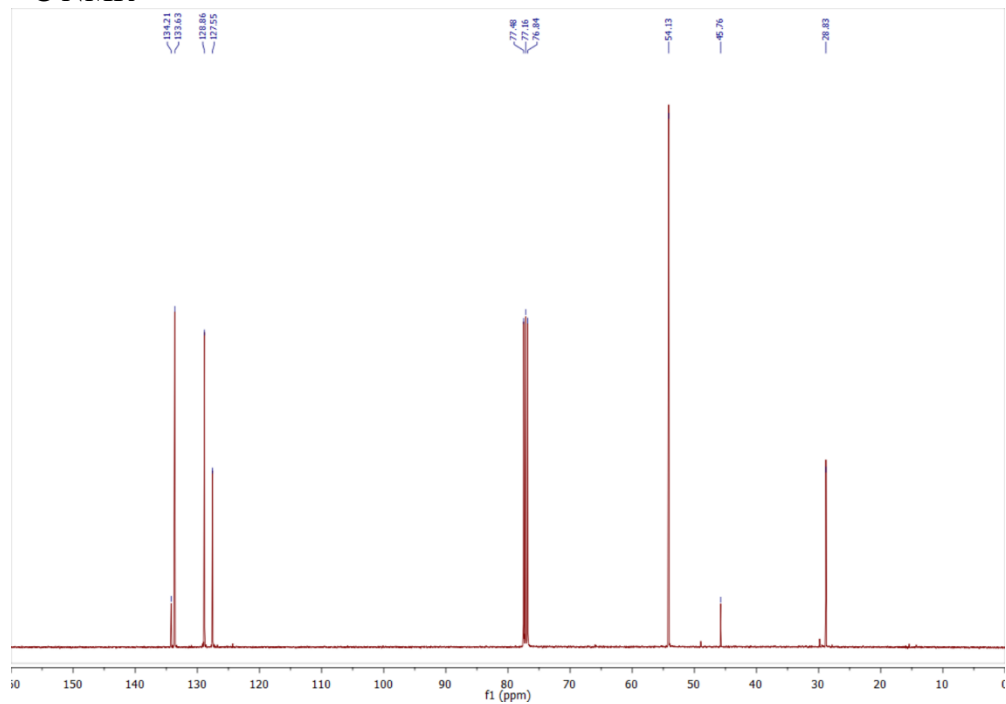

# [6a] 1,3-Bis(phenylthio)bicyclo[1.1.1]pentane

## <sup>1</sup>H NMR

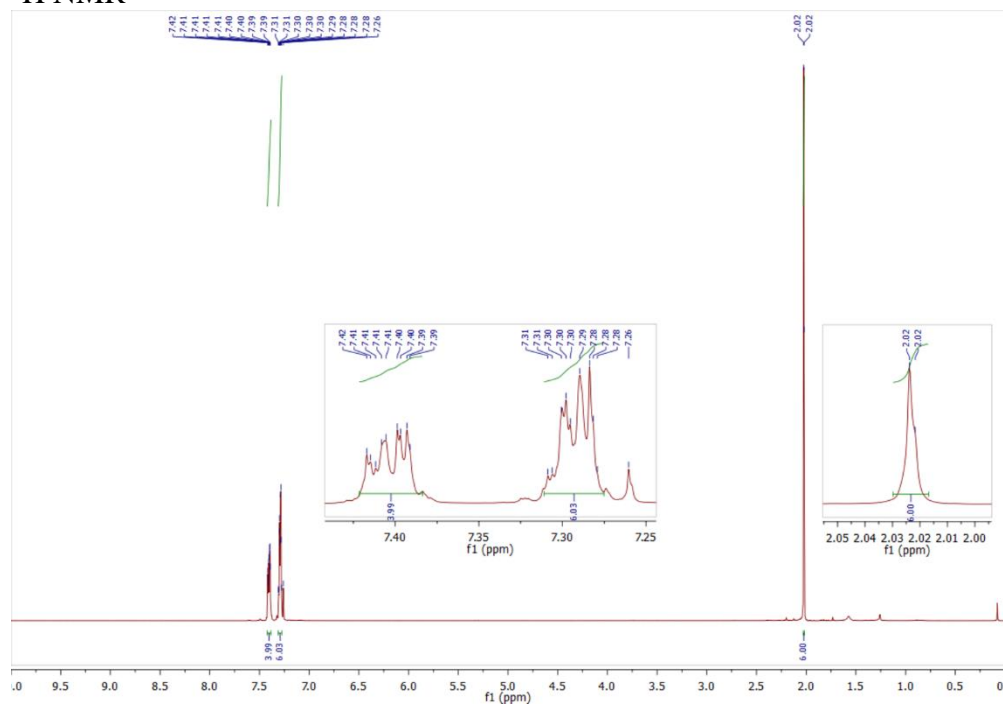

## <sup>13</sup>C NMR

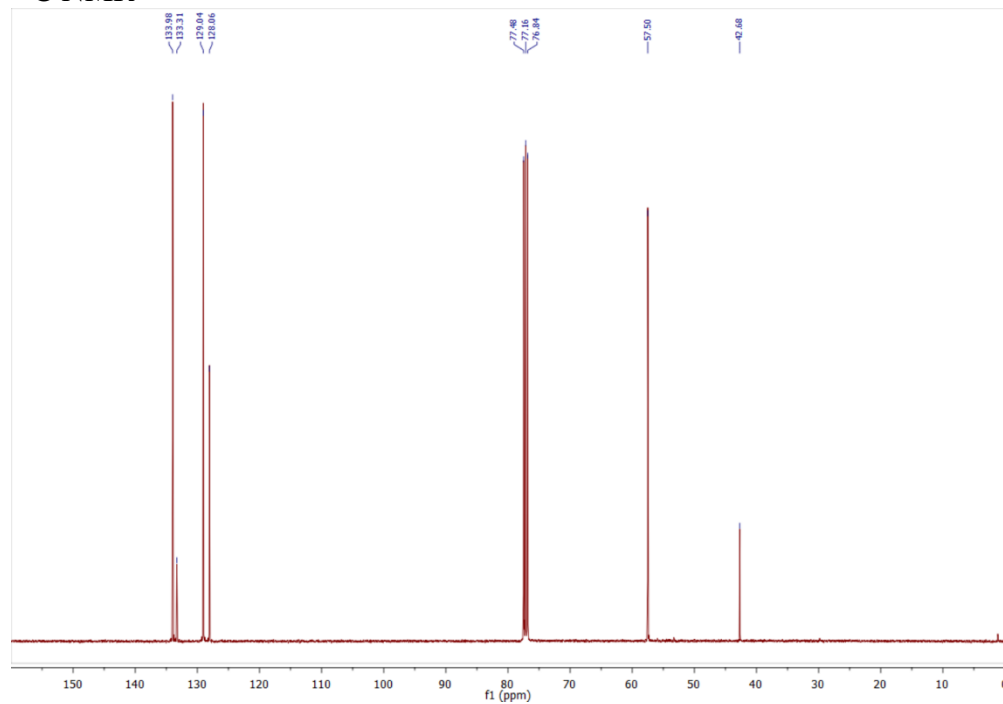

[6b] 1,3-Bis((4-chlorophenyl)thio)bicyclo[1.1.1]pentane

<sup>1</sup>H NMR

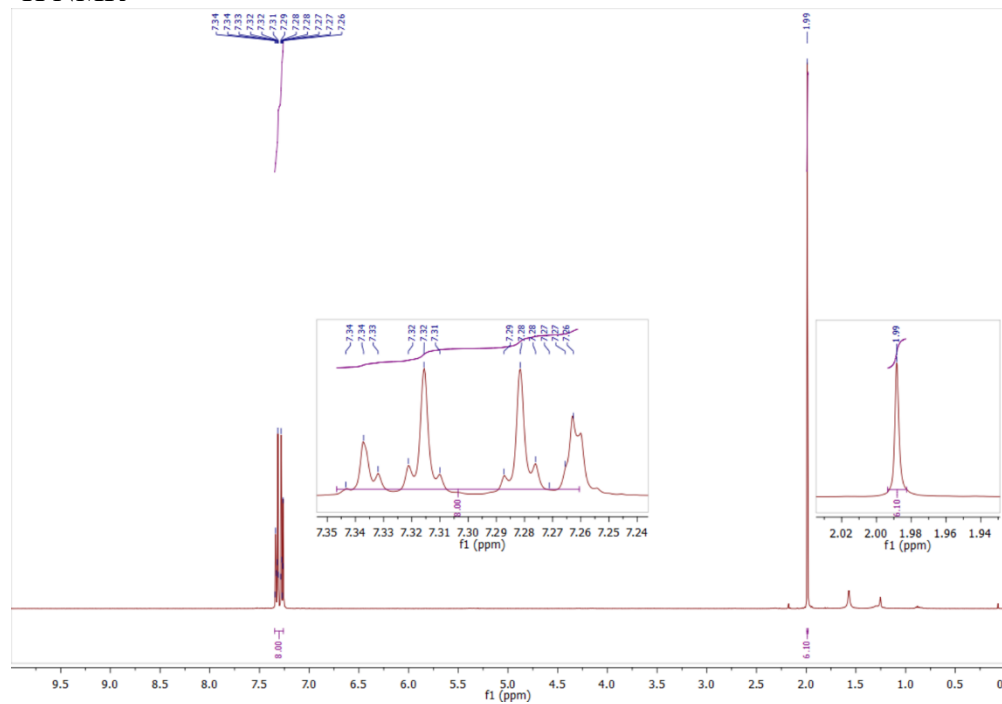

<sup>13</sup>C NMR

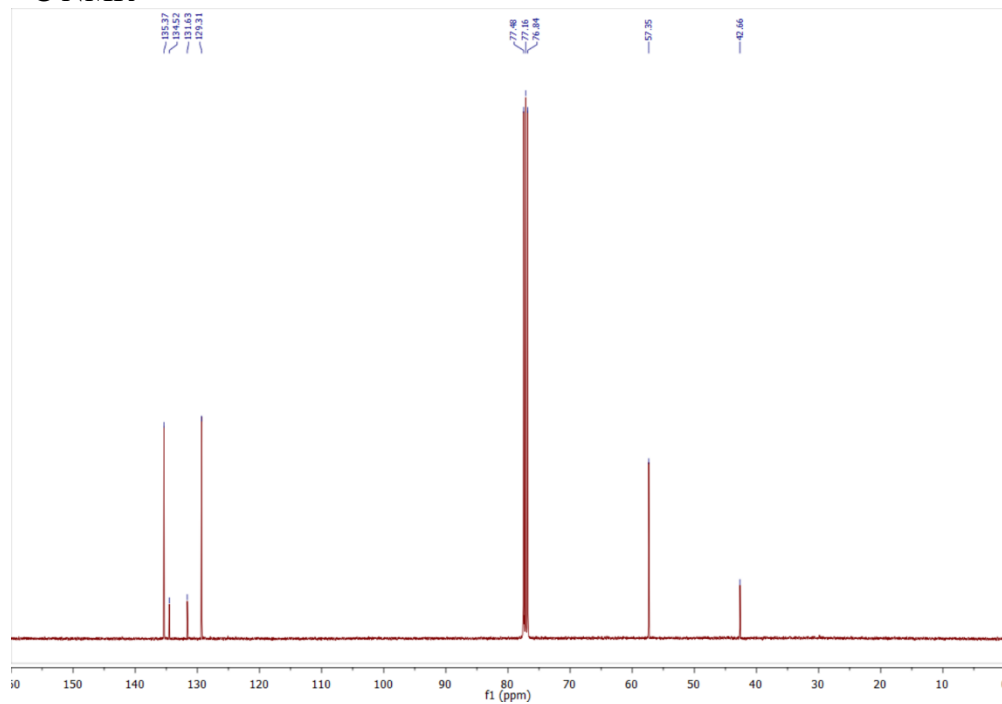

[6c] 1,3-Bis((3,5-dichlorophenyl)thio)bicyclo[1.1.1]pentane

<sup>1</sup>H NMR

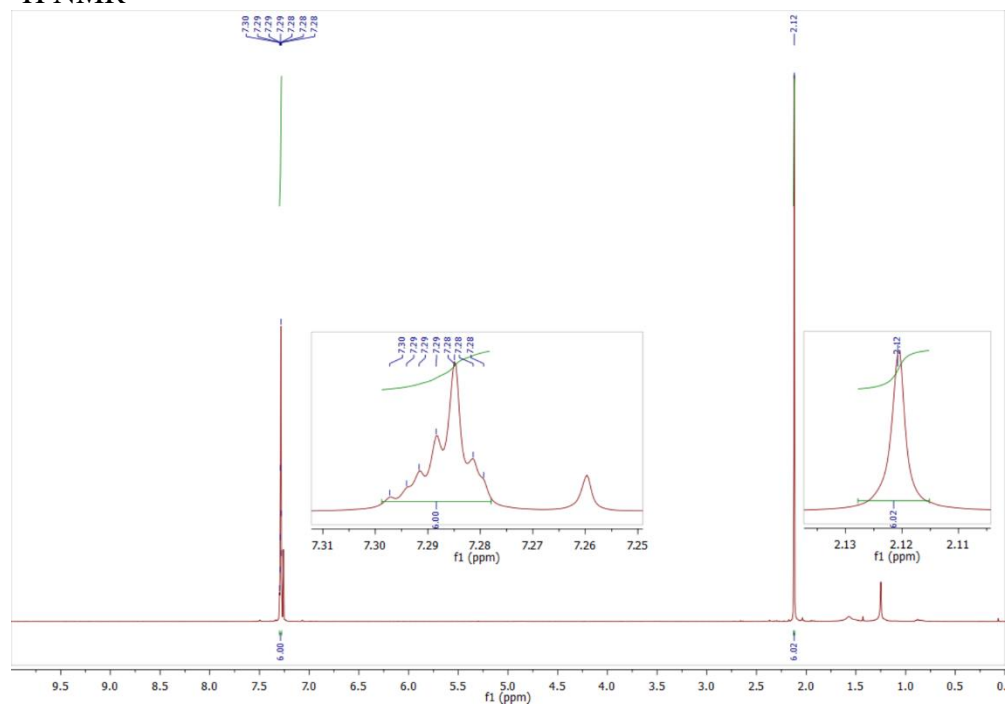

<sup>13</sup>C NMR

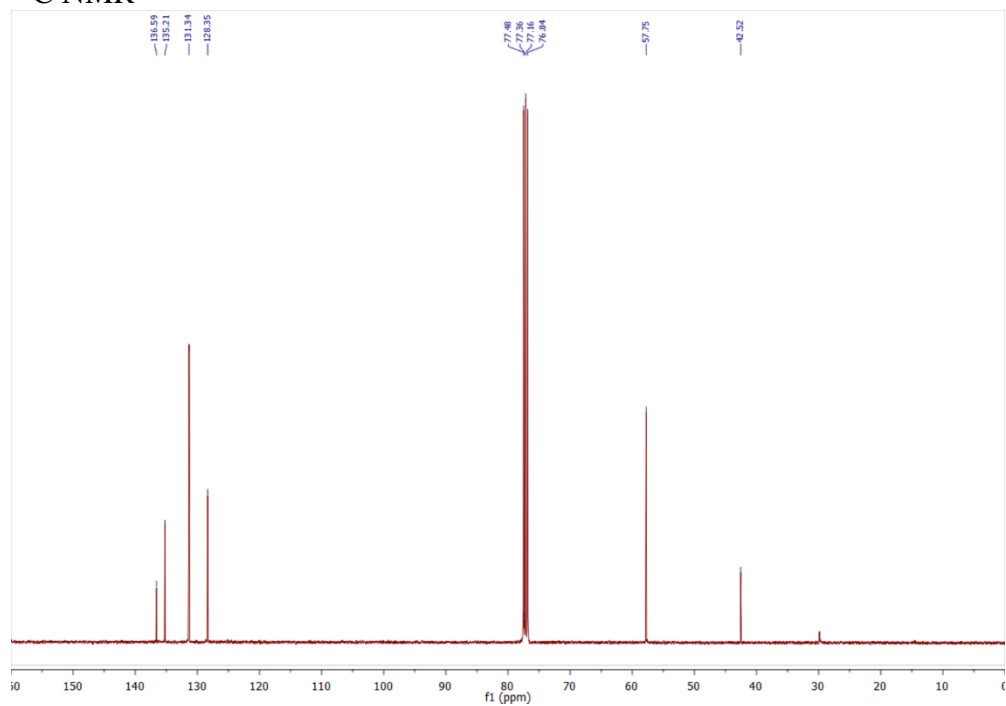

[6d] 1,3-Bis(*p*-tolylthio)bicyclo[1.1.1]pentane

<sup>1</sup>H NMR

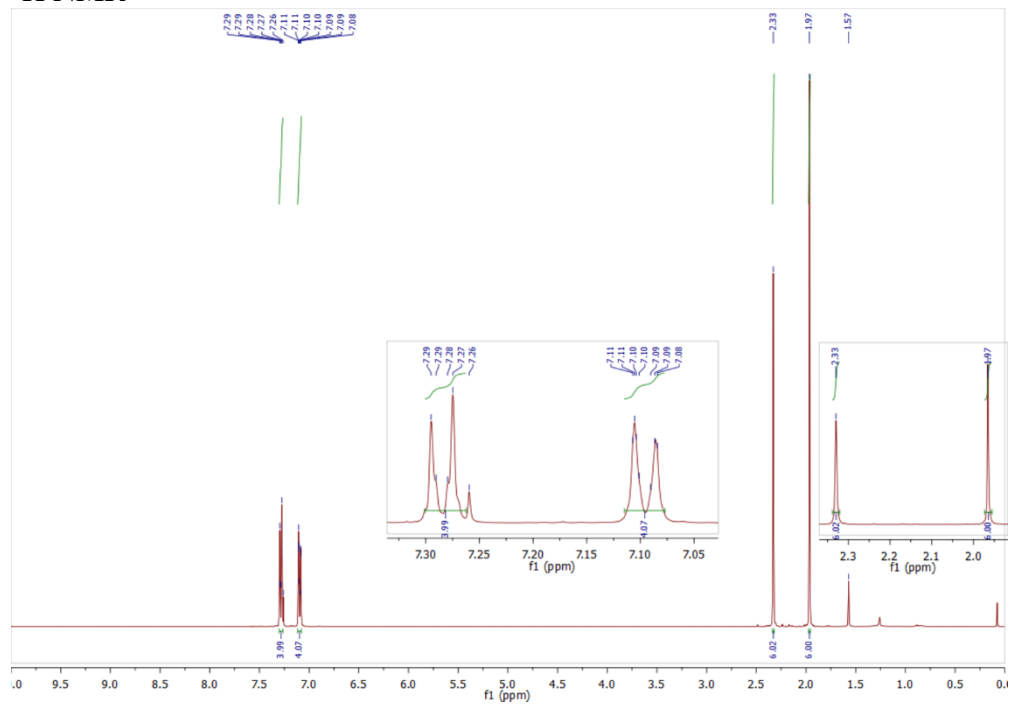

<sup>13</sup>C NMR

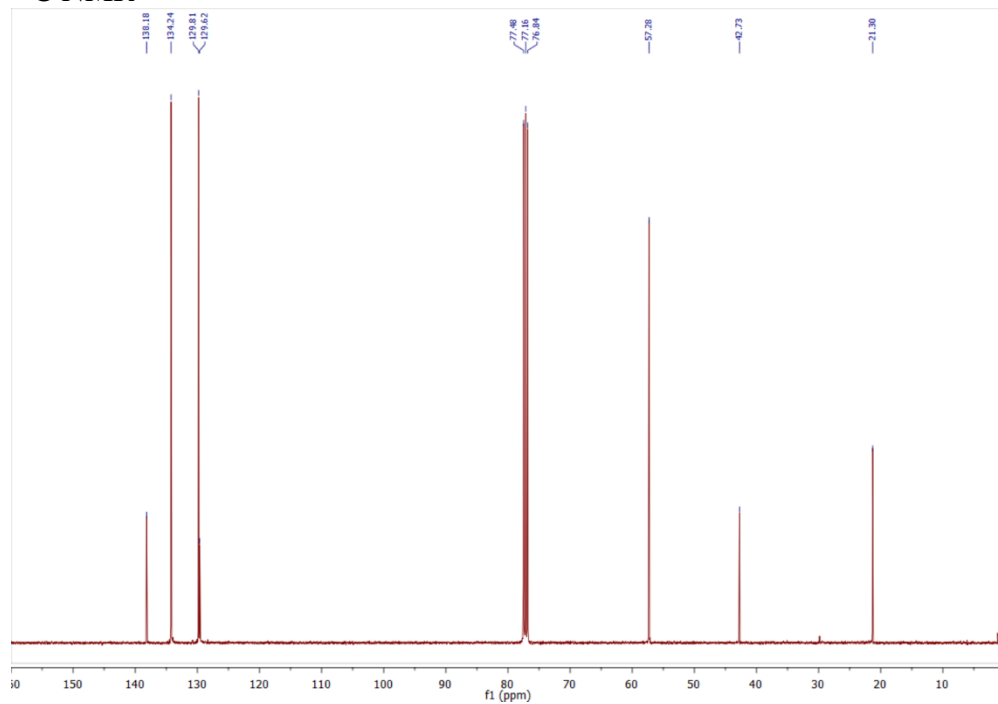

# [6e] 1,3-Bis((4-methoxyphenyl)thio)bicyclo[1.1.1]pentane

## <sup>1</sup>H NMR

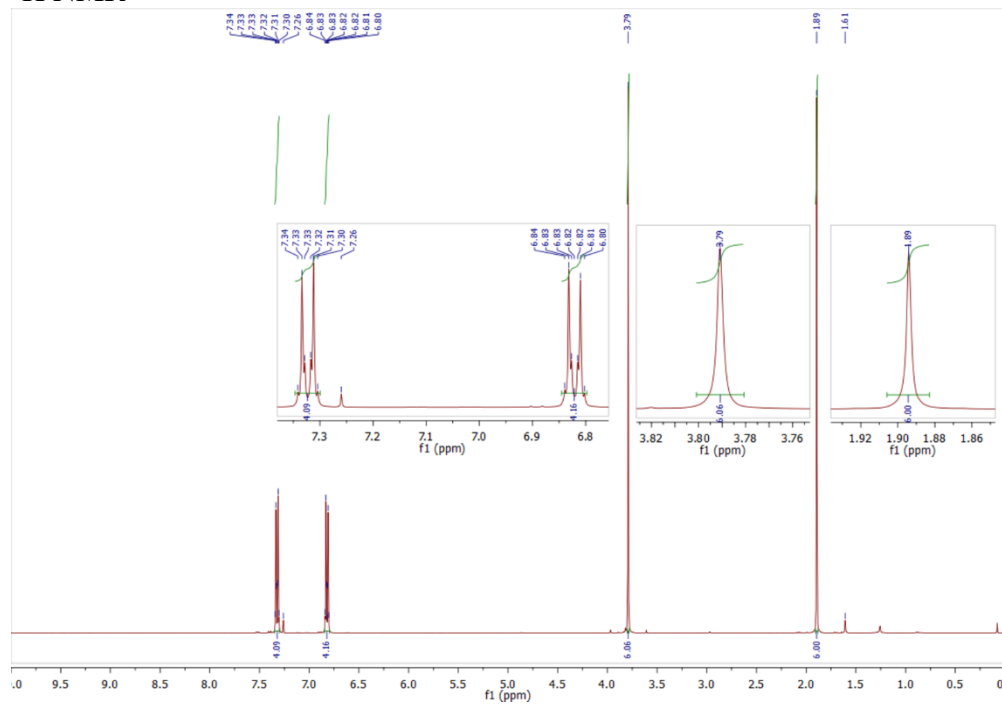

## <sup>13</sup>C NMR

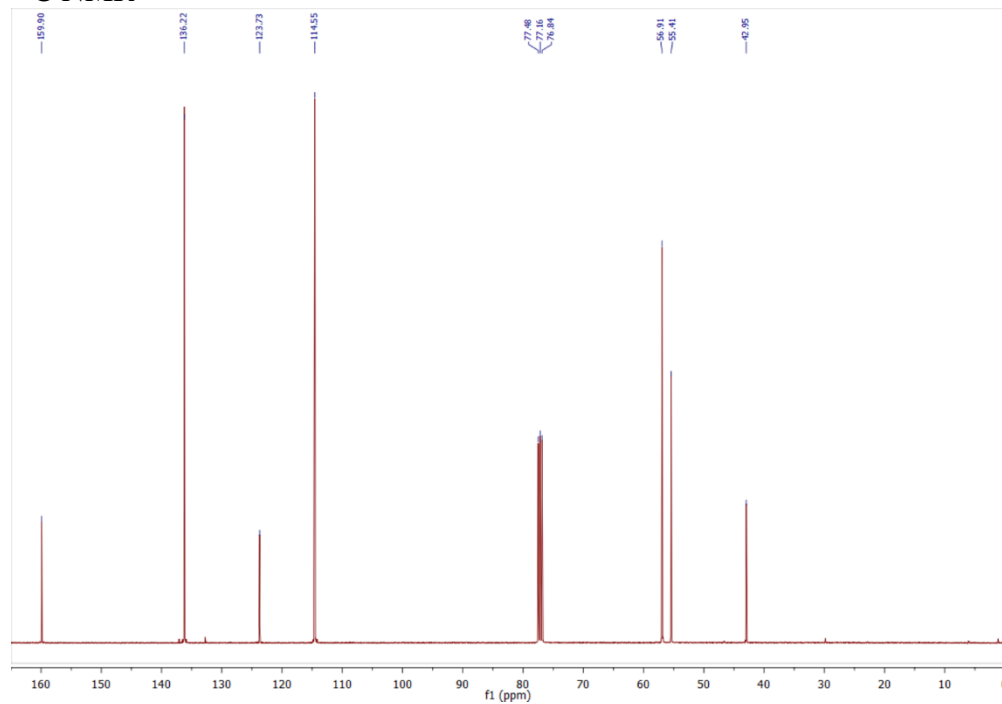

[6f] 1,3-Bis([1,1'-biphenyl]-2-ylthio)bicyclo[1.1.1]pentane

<sup>1</sup>H NMR

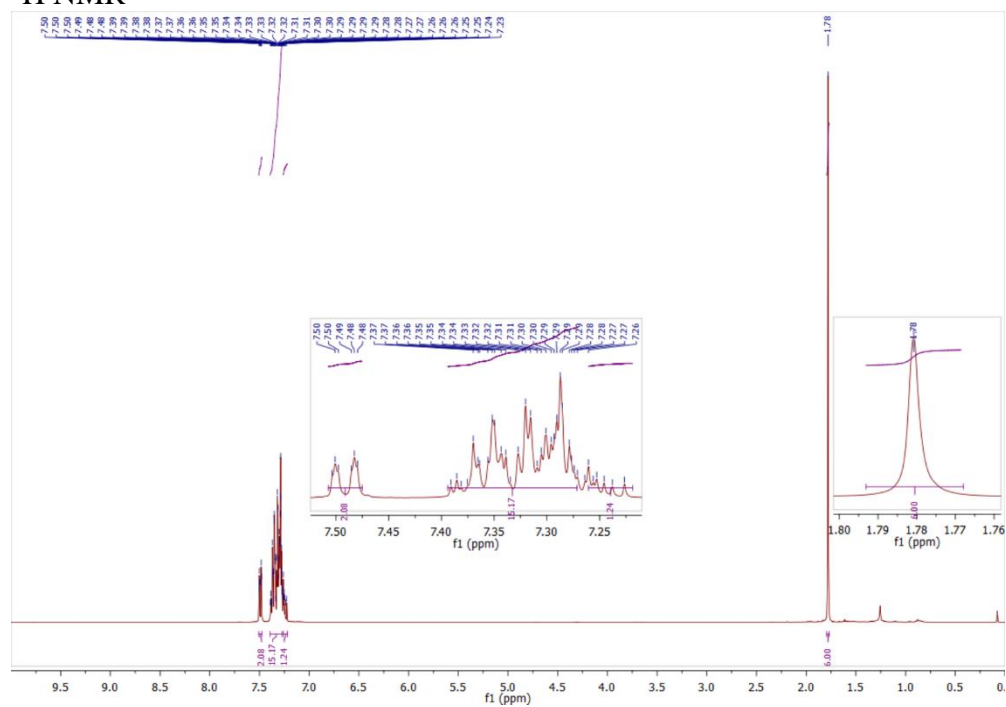

<sup>13</sup>C NMR

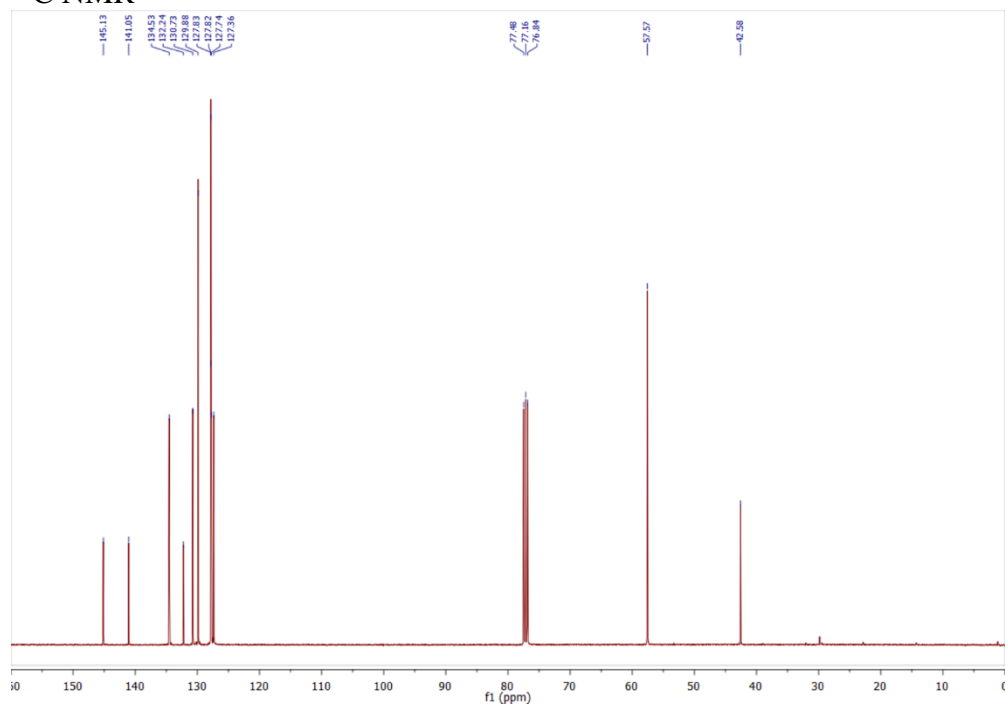



[10f] 1-Phenyl-2-[(2-phenylphenyl)disulfanyl]benzene

<sup>1</sup>H NMR

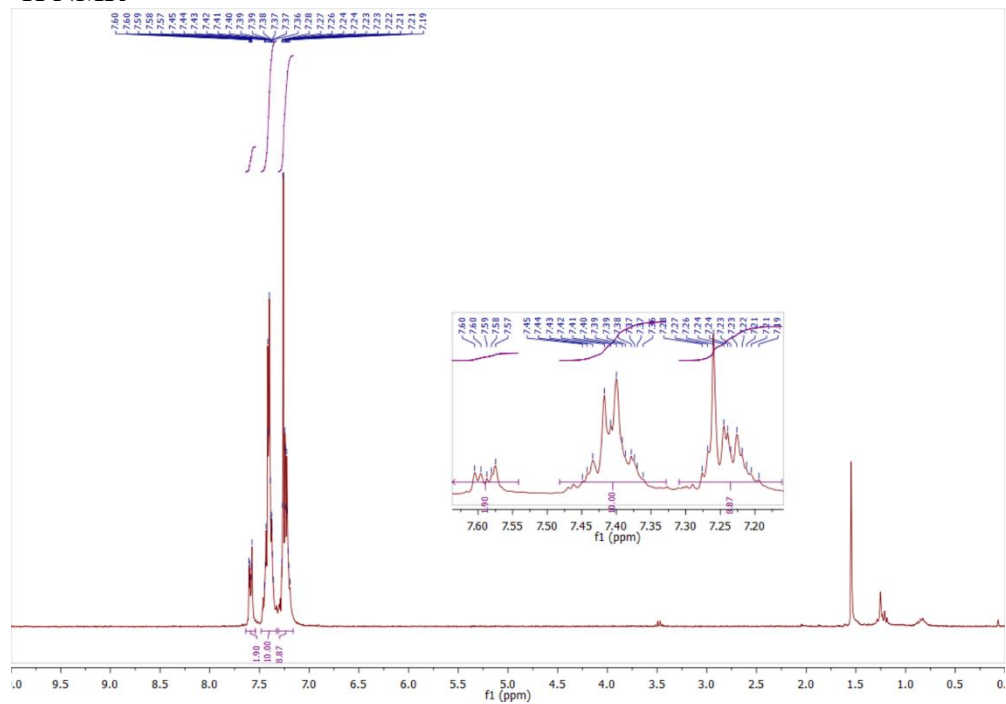

<sup>13</sup>C NMR

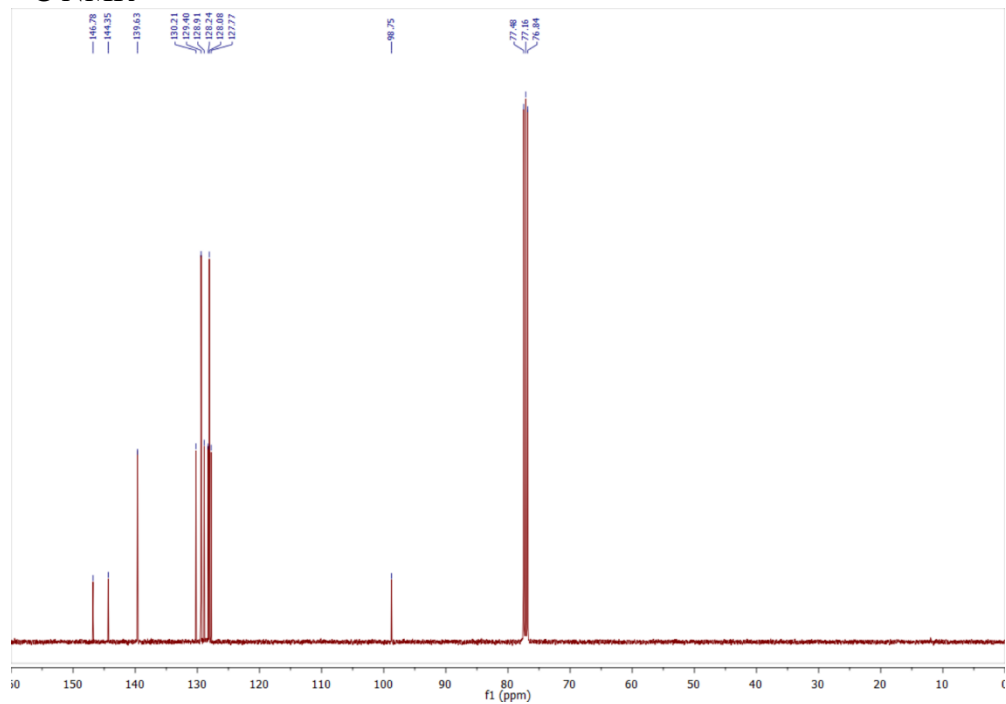

[11a] 3,3'-Bis(phenylthio)-1,1'-bi(bicyclo[1.1.1]pentane)

<sup>1</sup>H NMR

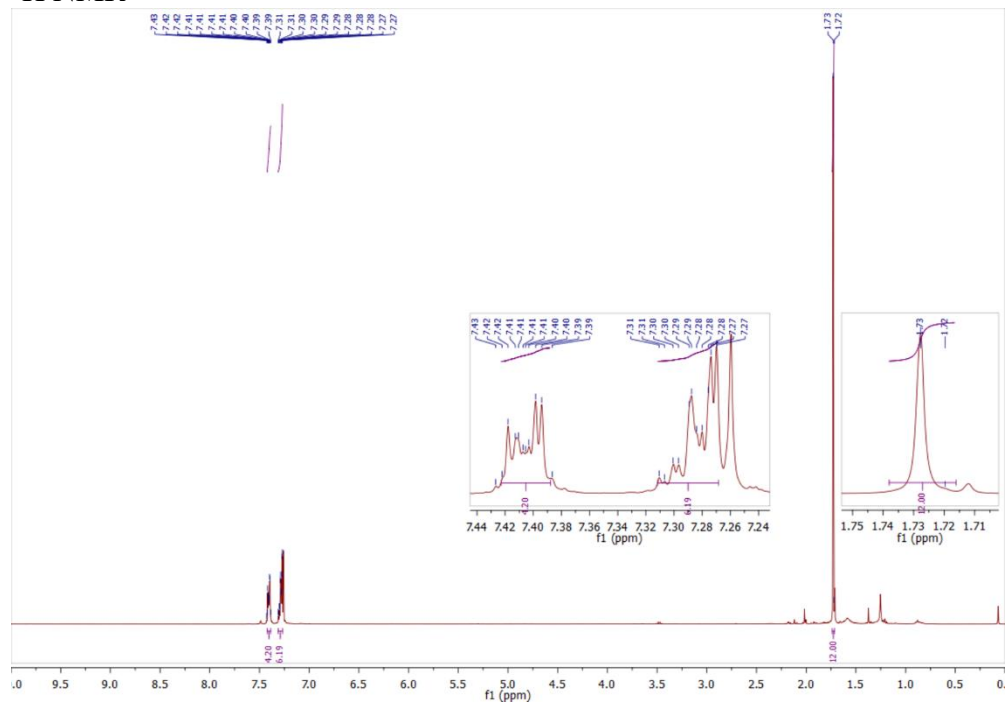

<sup>13</sup>C NMR

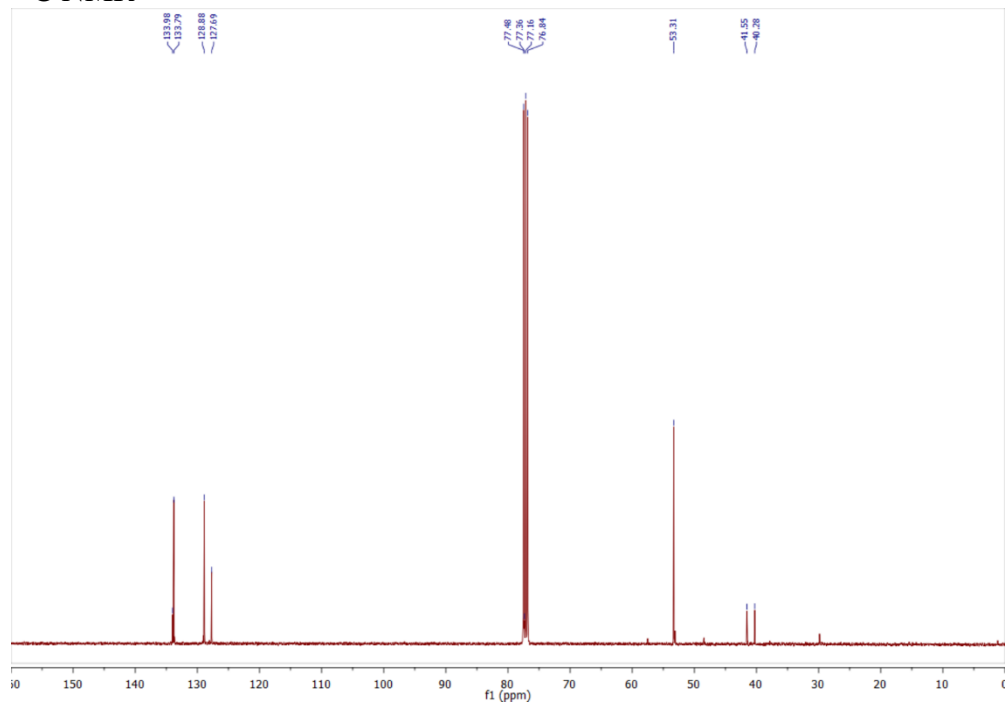

**[11b]** 3,3'-Bis((4-chlorophenyl)thio)-1,1'-bi(bicyclo[1.1.1]pentane)

<sup>1</sup>H NMR

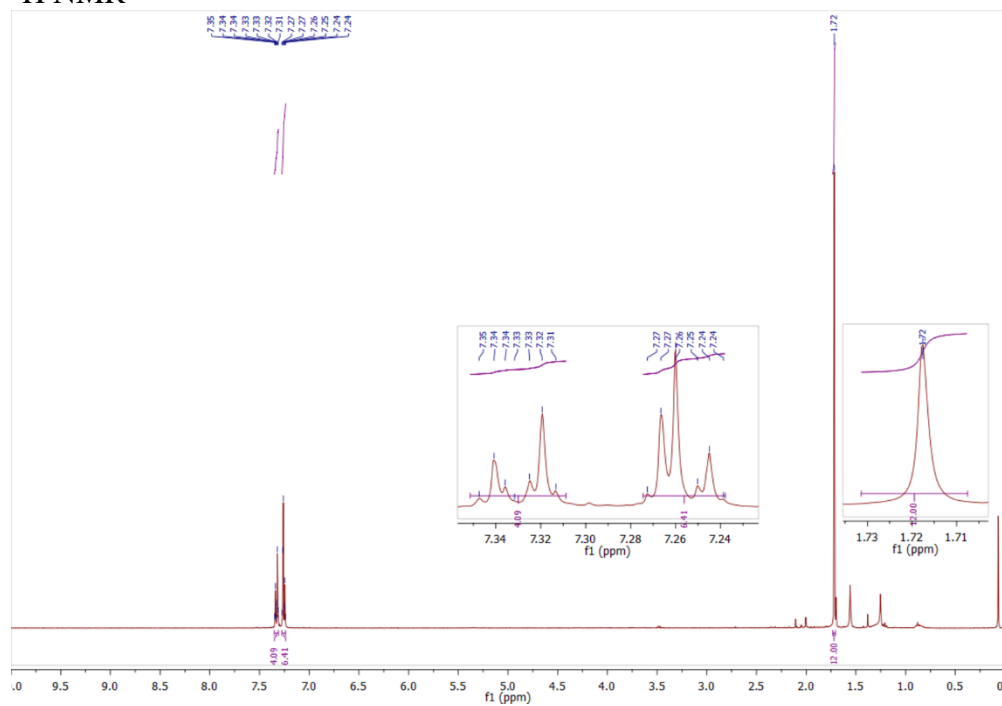

<sup>13</sup>C NMR

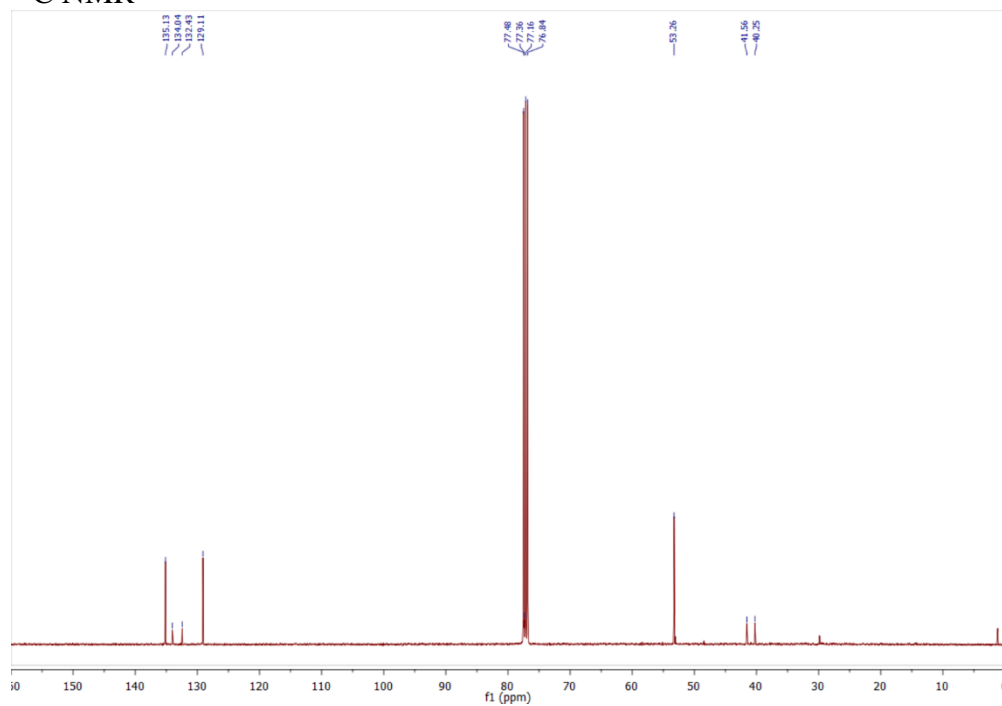

[11c] 3,3'-Bis((3,5-dichlorophenyl)thio)-1,1'-bi(bicyclo[1.1.1]pentane)

<sup>1</sup>H NMR

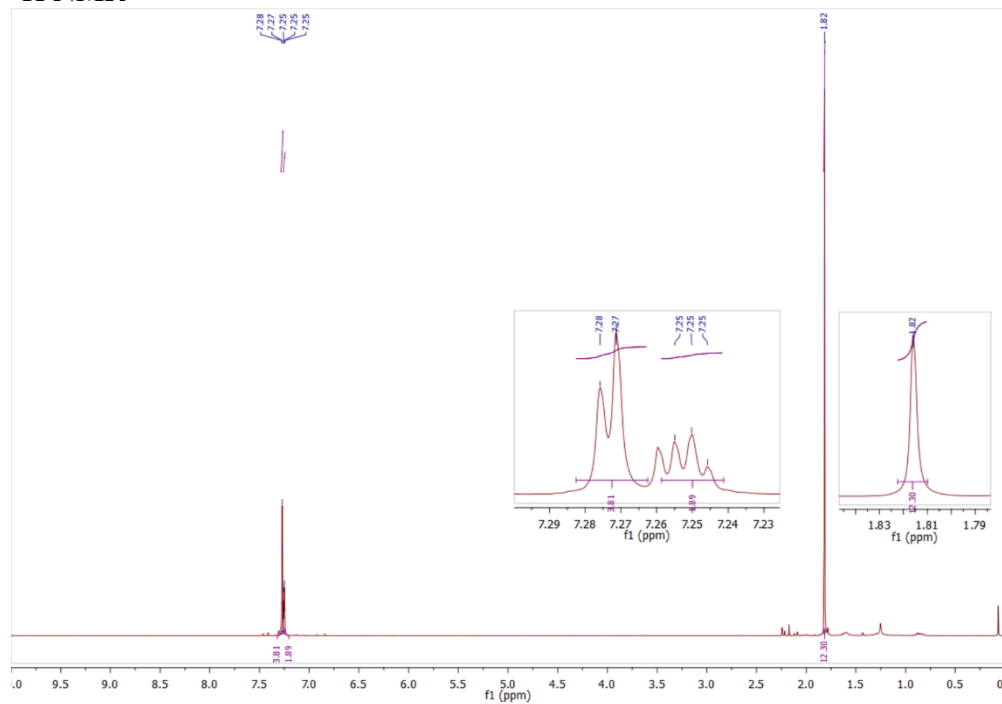

<sup>13</sup>C NMR

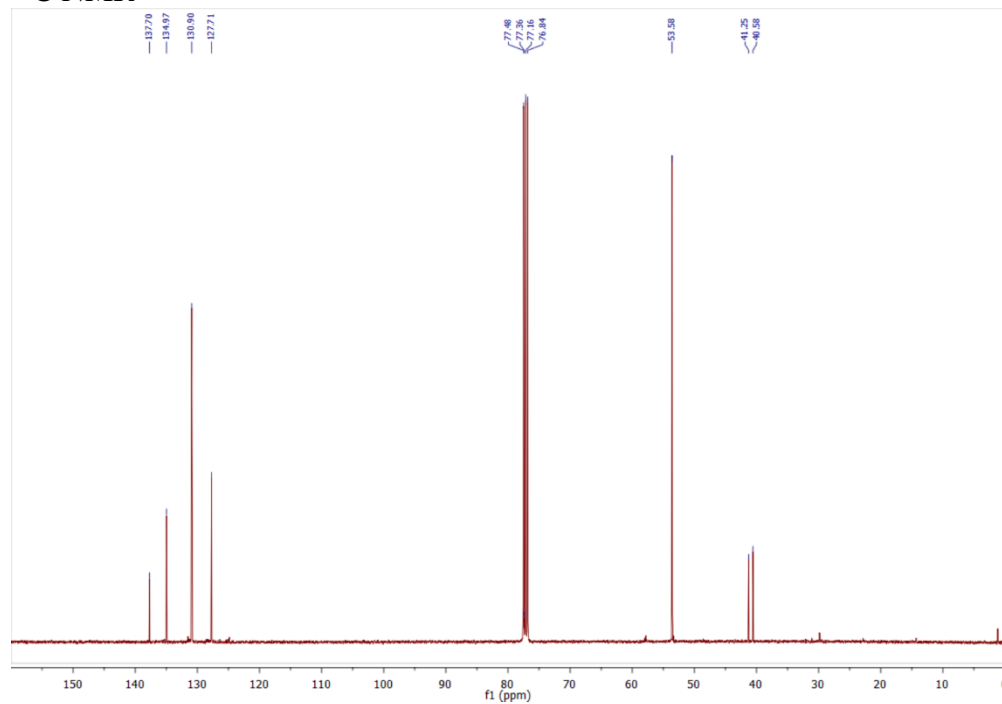

**[11d]** 3,3'-Bis(*p*-tolylthio)-1,1'-bi(bicyclo[1.1.1]pentane)

<sup>1</sup>H NMR

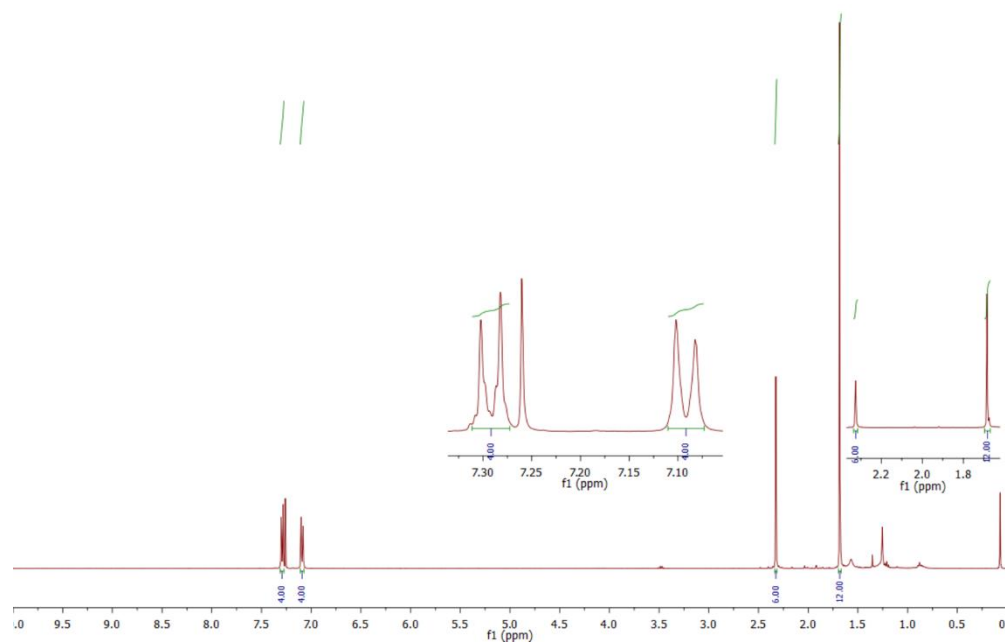

<sup>13</sup>C NMR

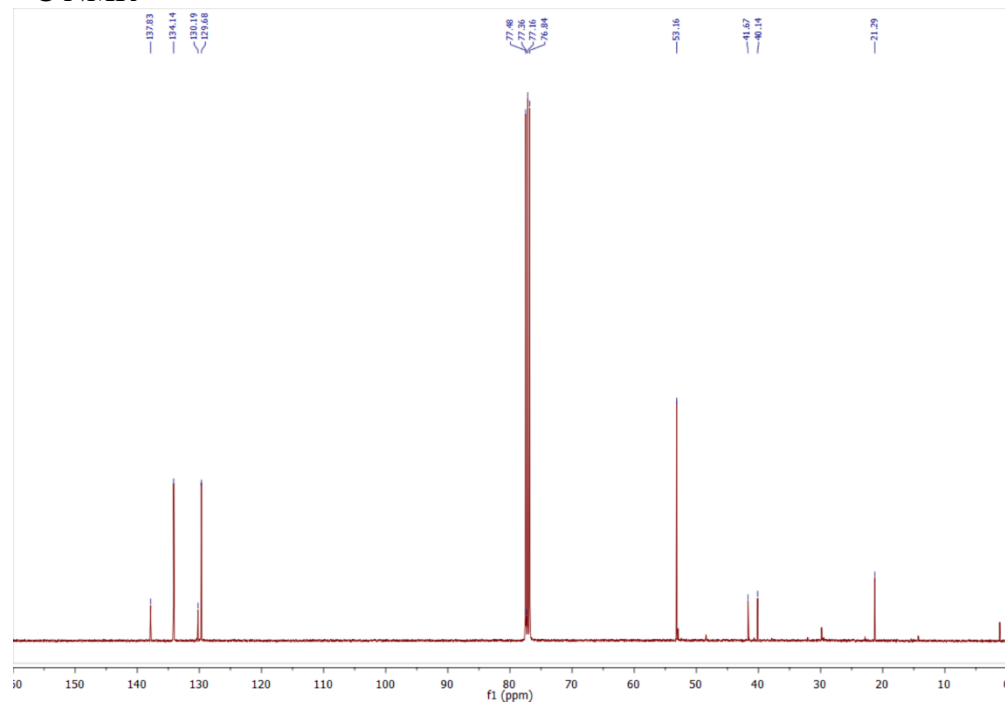

# [13] 1,3-Bis(benzylthio)bicyclo[1.1.1]pentane

## <sup>1</sup>H NMR

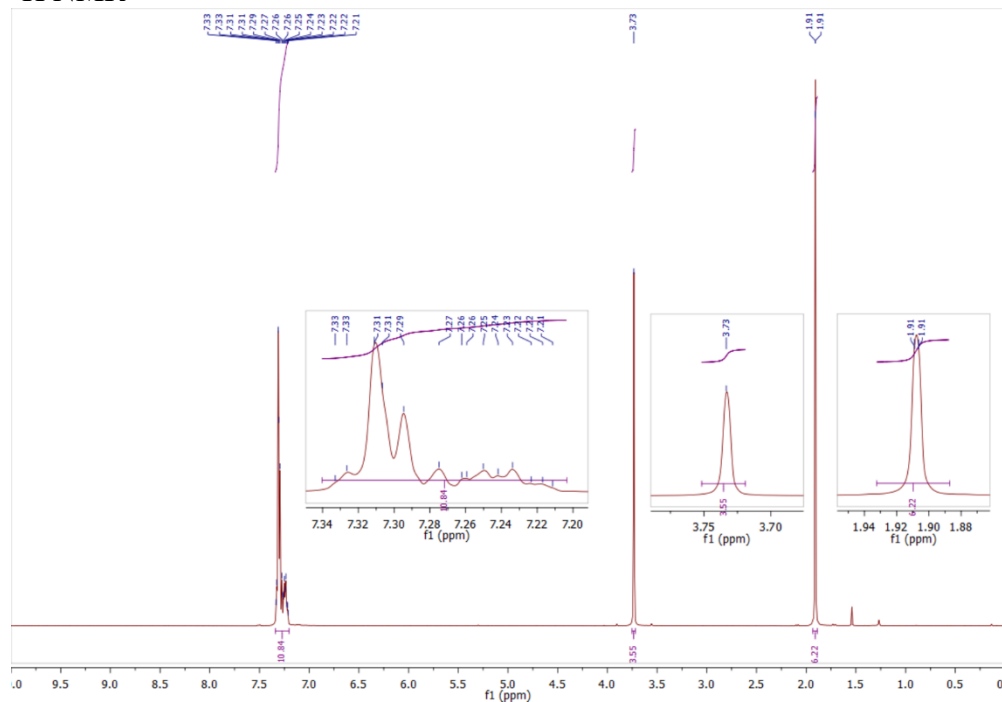

## <sup>13</sup>C NMR

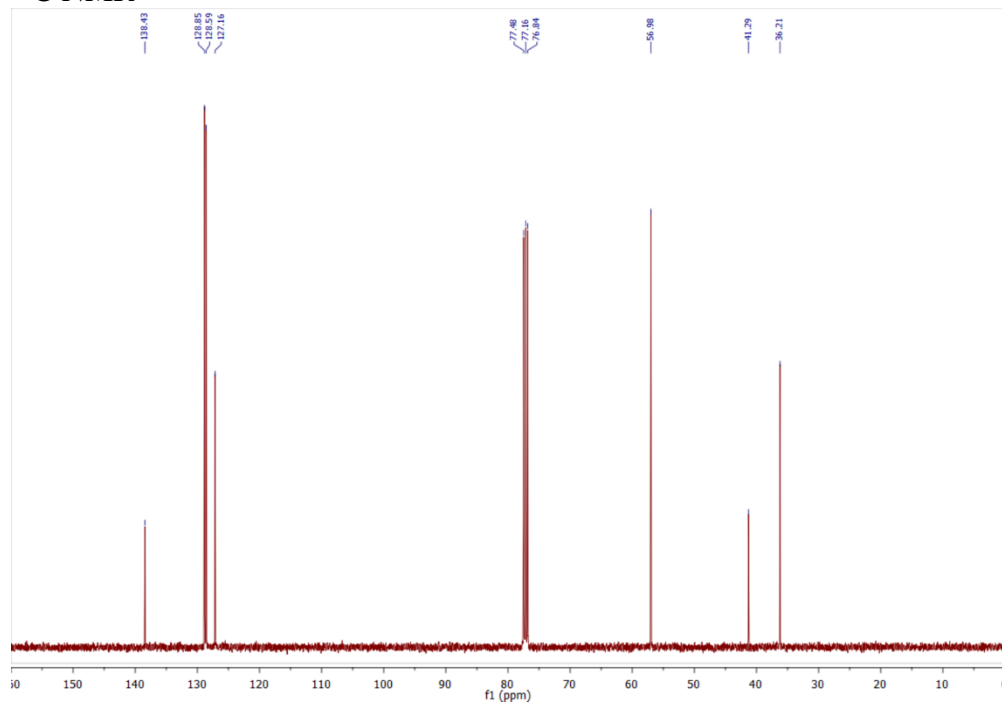

[15] 1-(Phenylthio)-3-(*p*-phenylthio)bicyclo[1.1.1]pentane

<sup>1</sup>H NMR

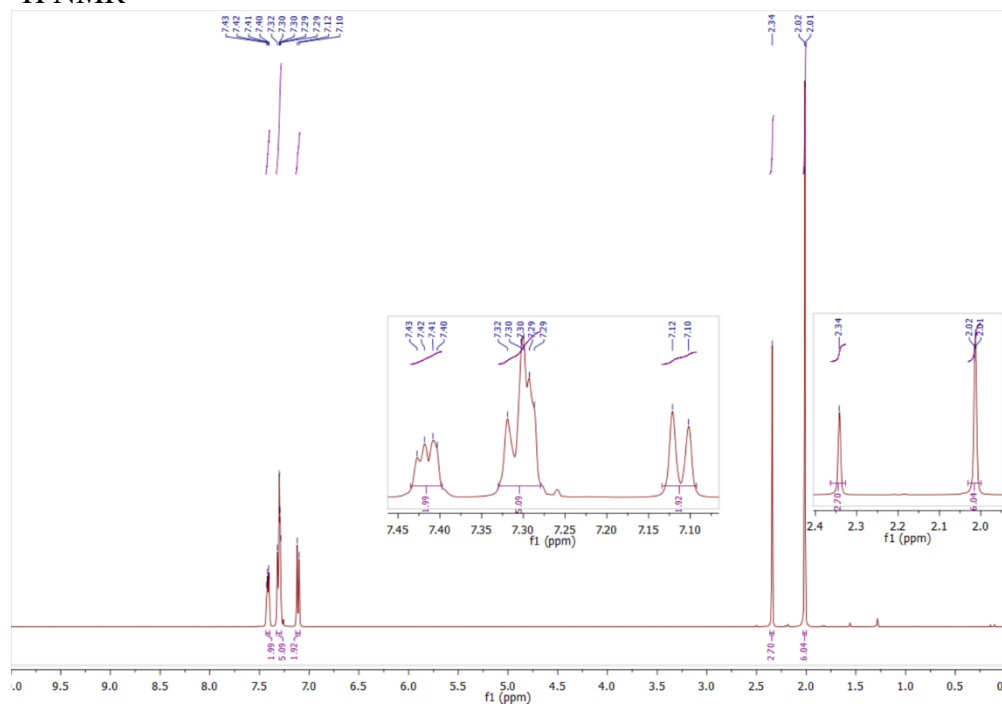

<sup>13</sup>C NMR

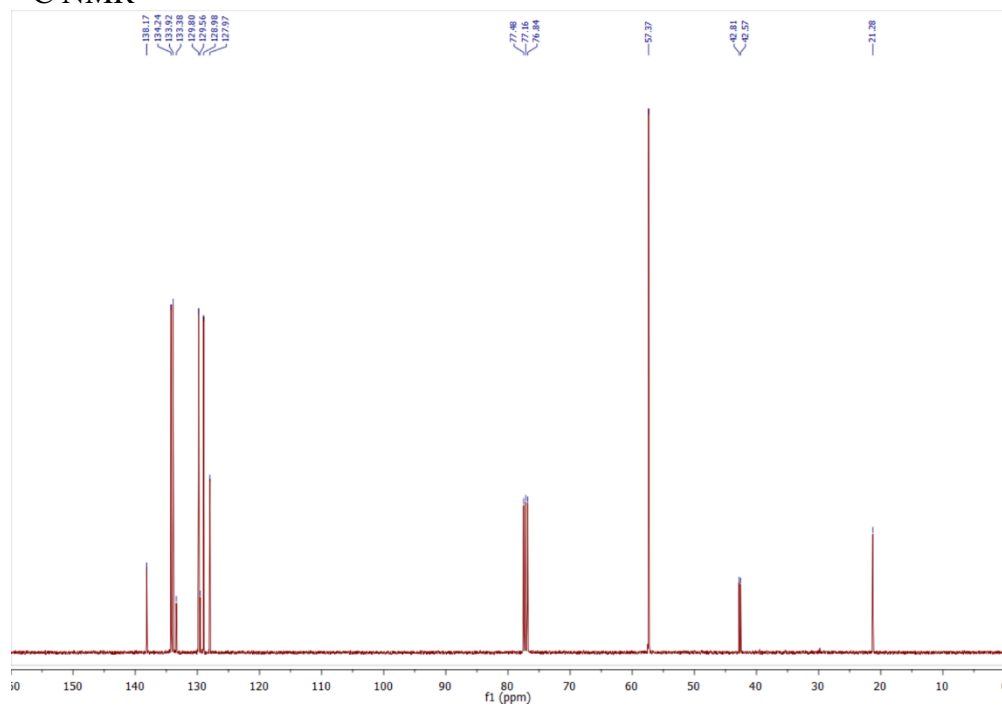

# [16] 1-(Phenylthio)-3-(4-methoxyphenylthio)bicyclo[1.1.1]pentane

## <sup>1</sup>H NMR

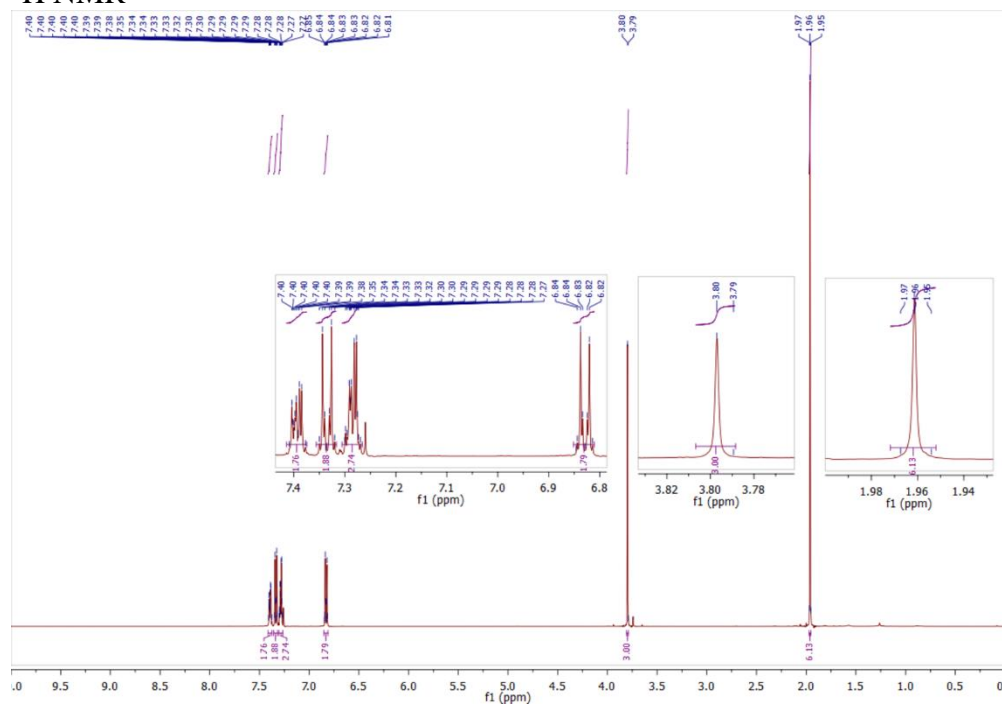

## <sup>13</sup>C NMR

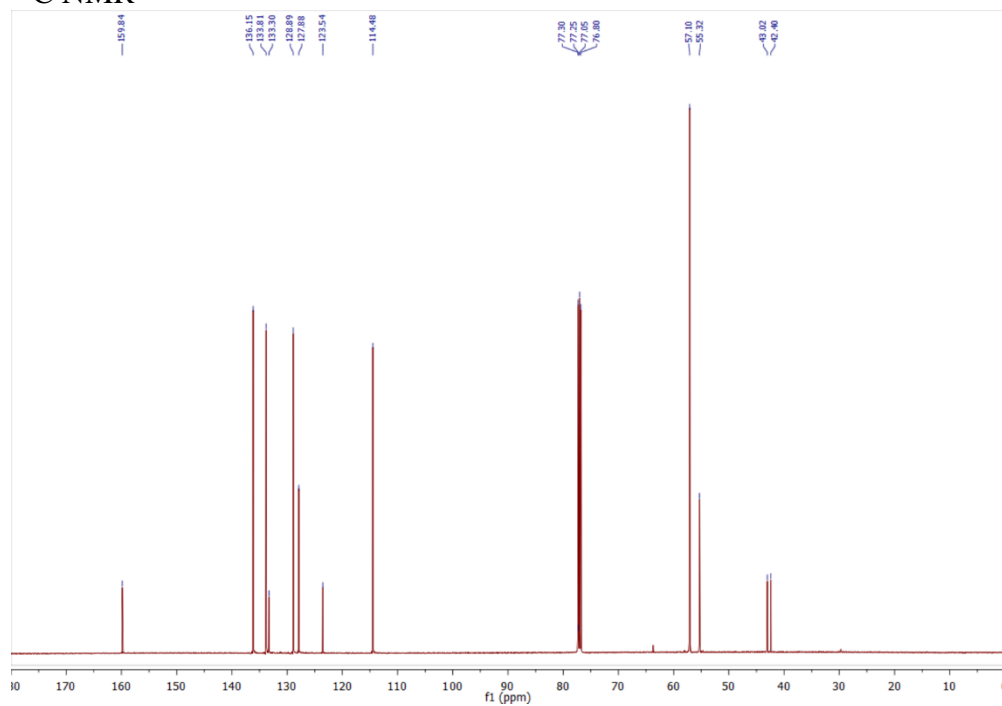



# [17] 1-Iodo-2-phenylbenzene

## <sup>1</sup>H NMR

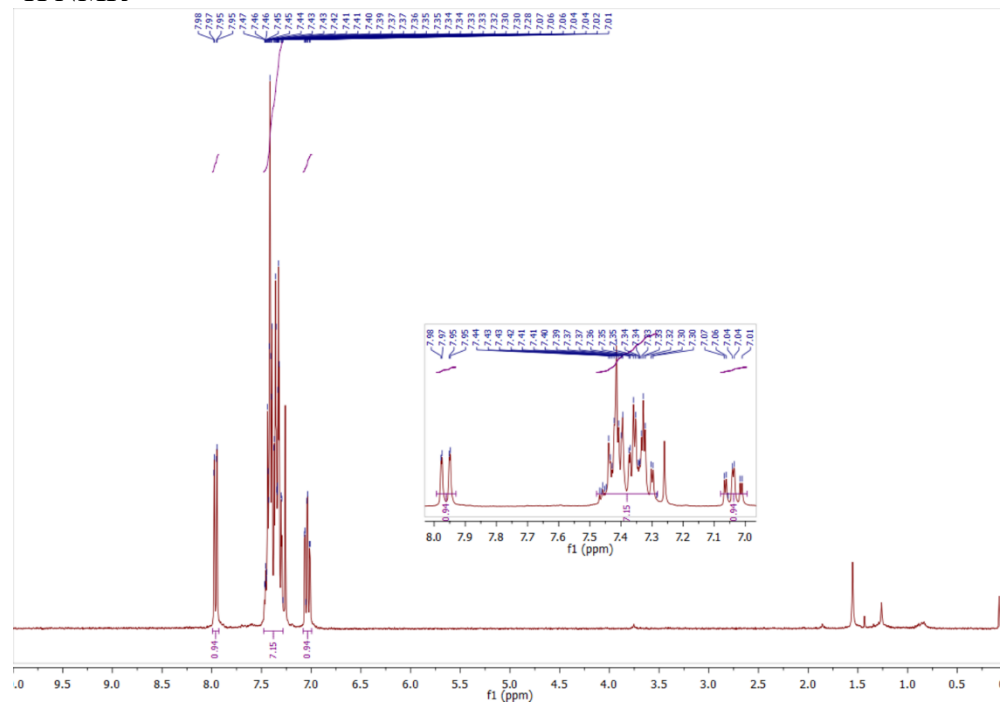

## <sup>13</sup>C NMR

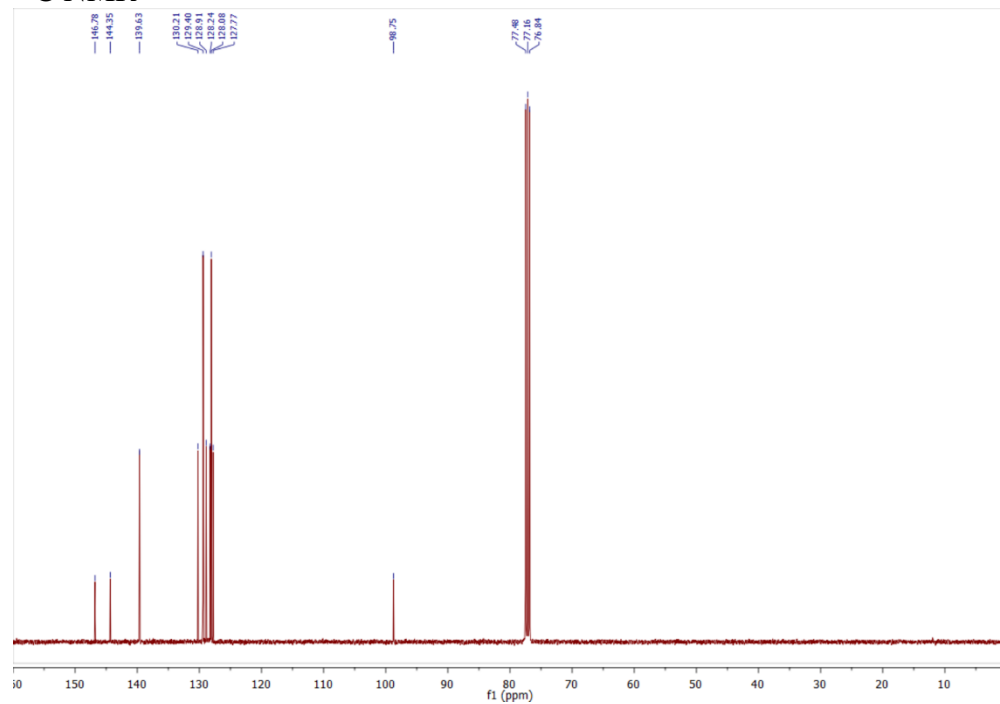

Supplement: Beilstein_J_Org_Chem-15-1172-s002.pdf [file Beilstein_J_Org_Chem-15-1172-s002.pdf]
