# Supplementary material for: Insertion of [1.1.1]propellane into aromatic disulfides
Source: Beilstein J Org Chem. 2019 May 28;15:1172–80. doi: 10.3762/bjoc.15.114 (PMC6604700; doi:10.3762/bjoc.15.114)
Supplement: File 3 — RInChIs. [file Beilstein_J_Org_Chem-15-1172-s003.xlsx]

## Sheet: ELN Report Reaction List
Article Reference					Article DOI
reference: Beilstein J. Org. Chem. 2019, 15, 1172–1180					doi:10.3762/bjoc.15.114
Label	Image	Name	InChI	InChIKey	Long-RInChIKey	Web-RInChIKey	Short-RInChIKey
5a		1-(phenylthio)bicyclo[1.1.1]pentane	InChI=1S/C11H12S/c1-2-4-10(5-3-1)12-11-6-9(7-11)8-11/h1-5,9H,6-8H2	AXGWEHWIGICNLX-UHFFFAOYSA-N	Long-RInChIKey=SA-BUHFF-AXGWEHWIGICNLX-UHFFFAOYSA-N--ZTXSPLGEGCABFL-UHFFFAOYSA-N--RMVRSNDYEFQCLF-UHFFFAOYSA-N	Web-RInChIKey=SYDZOVAAQARZTFVGB-NUHFFFADPSCTJSA	Short-RInChIKey=SA-BUHFF-AXGWEHWIGI-ZTXSPLGEGC-RMVRSNDYEF-NUHFF-NUHFF-NUHFF-ZZZ
6a		1,3-bis(phenylthio)bicyclo[1.1.1]pentane	InChI=1S/C17H16S2/c1-3-7-14(8-4-1)18-16-11-17(12-16,13-16)19-15-9-5-2-6-10-15/h1-10H,11-13H2	GHXRODNNSAZUSG-UHFFFAOYSA-N	Long-RInChIKey=SA-BUHFF-GHXRODNNSAZUSG-UHFFFAOYSA-N--ZTXSPLGEGCABFL-UHFFFAOYSA-N--GUUVPOWQJOLRAS-UHFFFAOYSA-N-WYURNTSHIVDZCO-UHFFFAOYSA-N	Web-RInChIKey=FCRUMVORGUPOMELNV-NUHFFFADPSCTJSA	Short-RInChIKey=SA-BUHFF-GHXRODNNSA-ZTXSPLGEGC-ONYULYKSFZ-NUHFF-NUHFF-NUHFF-ZZZ
6b		1,3-Bis((4-chlorophenyl)thio)bicyclo[1.1.1]pentane	InChI=1S/C17H14Cl2S2/c18-12-1-5-14(6-2-12)20-16-9-17(10-16,11-16)21-15-7-3-13(19)4-8-15/h1-8H,9-11H2	SJOKHIZPCGZHAT-UHFFFAOYSA-N	Long-RInChIKey=SA-BUHFF-SJOKHIZPCGZHAT-UHFFFAOYSA-N--ZTXSPLGEGCABFL-UHFFFAOYSA-N--ZIXXRXGPBFMPFD-UHFFFAOYSA-N-WYURNTSHIVDZCO-UHFFFAOYSA-N	Web-RInChIKey=ALEJJYUUPUDOCWYUY-NUHFFFADPSCTJSA	Short-RInChIKey=SA-BUHFF-SJOKHIZPCG-ZTXSPLGEGC-CAOPVXZGSL-NUHFF-NUHFF-NUHFF-ZZZ
6c		1,3-Bis((3,5-dichlorophenyl)thio)bicyclo[1.1.1]pentane	InChI=1S/C17H12Cl4S2/c18-10-1-11(19)4-14(3-10)22-16-7-17(8-16,9-16)23-15-5-12(20)2-13(21)6-15/h1-6H,7-9H2	DHAJMGHBXKCZPF-UHFFFAOYSA-N	Long-RInChIKey=SA-BUHFF-DHAJMGHBXKCZPF-UHFFFAOYSA-N--ZTXSPLGEGCABFL-UHFFFAOYSA-N--JMQANWHMOHXBEA-UHFFFAOYSA-N-WYURNTSHIVDZCO-UHFFFAOYSA-N	Web-RInChIKey=HNFAVDNUVXZXTGPSP-NUHFFFADPSCTJSA	Short-RInChIKey=SA-BUHFF-DHAJMGHBXK-ZTXSPLGEGC-OIMIDMTXHI-NUHFF-NUHFF-NUHFF-ZZZ
6d		1,3-Bis(p-tolylthio)bicyclo[1.1.1]pentane	InChI=1S/C19H20S2/c1-14-3-7-16(8-4-14)20-18-11-19(12-18,13-18)21-17-9-5-15(2)6-10-17/h3-10H,11-13H2,1-2H3	NZNGNSDNZKZZOJ-UHFFFAOYSA-N	Long-RInChIKey=SA-BUHFF-NZNGNSDNZKZZOJ-UHFFFAOYSA-N--ZTXSPLGEGCABFL-UHFFFAOYSA-N--TZOVOULUMXXLOJ-UHFFFAOYSA-N-WYURNTSHIVDZCO-UHFFFAOYSA-N	Web-RInChIKey=BHESLWSYRYTCEGFXY-NUHFFFADPSCTJSA	Short-RInChIKey=SA-BUHFF-NZNGNSDNZK-ZTXSPLGEGC-LYVSJXCAEO-NUHFF-NUHFF-NUHFF-ZZZ
6e		1,3-Bis((4-methoxyphenyl)thio)bicyclo[1.1.1]pentane	InChI=1S/C19H20O2S2/c1-20-14-3-7-16(8-4-14)22-18-11-19(12-18,13-18)23-17-9-5-15(21-2)6-10-17/h3-10H,11-13H2,1-2H3	AWYXHOMVLAPYSJ-UHFFFAOYSA-N	Long-RInChIKey=SA-BUHFF-AWYXHOMVLAPYSJ-UHFFFAOYSA-N--ZTXSPLGEGCABFL-UHFFFAOYSA-N--PZQGLCGLPMWYBT-UHFFFAOYSA-N-WYURNTSHIVDZCO-UHFFFAOYSA-N	Web-RInChIKey=XEHKEPYFGNGKNBKWV-NUHFFFADPSCTJSA	Short-RInChIKey=SA-BUHFF-AWYXHOMVLA-ZTXSPLGEGC-MURUWONBHK-NUHFF-NUHFF-NUHFF-ZZZ
17		1-Iodo-2-phenylbenzene	InChI=1S/C12H9I/c13-12-9-5-4-8-11(12)10-6-2-1-3-7-10/h1-9H	QFUYDAGNUJWBSM-UHFFFAOYSA-N	Long-RInChIKey=SA-FUHFF-TWBPWBPGNQWFSJ-UHFFFAOYSA-N--QFUYDAGNUJWBSM-UHFFFAOYSA-N--WEVYAHXRMPXWCK-UHFFFAOYSA-N-IOGXOCVLYRDXLW-UHFFFAOYSA-N-KJIFKLIQANRMOU-UHFFFAOYSA-N-NLKNQRATVPKPDG-UHFFFAOYSA-M	Web-RInChIKey=ROZUXYUPPHQQHJDOA-MUHFFFADPSCTJSA	Short-RInChIKey=SA-FUHFF-TWBPWBPGNQ-QFUYDAGNUJ-WLXMTCQKGN-NUHFF-NUHFF-MUHFF-ZZZ
10f		1-Phenyl-2-[(2-phenylphenyl)disulfanyl]benzene	InChI=1S/C24H18S2/c1-3-11-19(12-4-1)21-15-7-9-17-23(21)25-26-24-18-10-8-16-22(24)20-13-5-2-6-14-20/h1-18H	JKPTZWVDCSARTM-UHFFFAOYSA-N	Long-RInChIKey=SA-FUHFF-QFUYDAGNUJWBSM-UHFFFAOYSA-N--JKPTZWVDCSARTM-UHFFFAOYSA-N--UIINQVYGFKNSPA-UHFFFAOYSA-N-ZMXDDKWLCZADIW-UHFFFAOYSA-N-LSXDOTMGLUJQCM-UHFFFAOYSA-M-NINIDFKCEFEMDL-UHFFFAOYSA-N	Web-RInChIKey=WPVGDPDJLKATHIWBC-MUHFFFADPSCTJSA	Short-RInChIKey=SA-FUHFF-QFUYDAGNUJ-JKPTZWVDCS-NRTLLTLYEJ-NUHFF-NUHFF-MUHFF-ZZZ
6f		1,3-Bis([1,1'-biphenyl]-2-ylthio)bicyclo[1.1.1]pentane	InChI=1S/C29H24S2/c1-3-11-22(12-4-1)24-15-7-9-17-26(24)30-28-19-29(20-28,21-28)31-27-18-10-8-16-25(27)23-13-5-2-6-14-23/h1-18H,19-21H2	PINRSYZIAIUFQE-UHFFFAOYSA-N	Long-RInChIKey=SA-FUHFF-JKPTZWVDCSARTM-UHFFFAOYSA-N-ZTXSPLGEGCABFL-UHFFFAOYSA-N--PINRSYZIAIUFQE-UHFFFAOYSA-N--WYURNTSHIVDZCO-UHFFFAOYSA-N	Web-RInChIKey=SPMPWSAGSGHXGSHLK-NUHFFFADPSCTJSA	Short-RInChIKey=SA-FUHFF-MWLWPECRDQ-PINRSYZIAI-WYURNTSHIV-NUHFF-NUHFF-NUHFF-ZZZ
6a		1,3-Bis(phenylthio)bicyclo[1.1.1]pentane	InChI=1S/C17H16S2/c1-3-7-14(8-4-1)18-16-11-17(12-16,13-16)19-15-9-5-2-6-10-15/h1-10H,11-13H2	GHXRODNNSAZUSG-UHFFFAOYSA-N	Long-RInChIKey=SA-FUHFF-GUUVPOWQJOLRAS-UHFFFAOYSA-N-ZTXSPLGEGCABFL-UHFFFAOYSA-N--GHXRODNNSAZUSG-UHFFFAOYSA-N-UFJZAHXFSRPBMA-UHFFFAOYSA-N--WYURNTSHIVDZCO-UHFFFAOYSA-N	Web-RInChIKey=JJNKZJFXRJAZMFSLP-NUHFFFADPSCTJSA	Short-RInChIKey=SA-FUHFF-ILUMTPAQJZ-HQLMMCQLNP-WYURNTSHIV-NUHFF-NUHFF-NUHFF-ZZZ
11a		3,3'-Bis(phenylthio)-1,1'-bi(bicyclo[1.1.1]pentane)	InChI=1S/C22H22S2/c1-3-7-17(8-4-1)23-21-11-19(12-21,13-21)20-14-22(15-20,16-20)24-18-9-5-2-6-10-18/h1-10H,11-16H2	UFJZAHXFSRPBMA-UHFFFAOYSA-N	Long-RInChIKey=SA-FUHFF-GUUVPOWQJOLRAS-UHFFFAOYSA-N-ZTXSPLGEGCABFL-UHFFFAOYSA-N--GHXRODNNSAZUSG-UHFFFAOYSA-N-UFJZAHXFSRPBMA-UHFFFAOYSA-N--WYURNTSHIVDZCO-UHFFFAOYSA-N	Web-RInChIKey=JJNKZJFXRJAZMFSLP-NUHFFFADPSCTJSA	Short-RInChIKey=SA-FUHFF-ILUMTPAQJZ-HQLMMCQLNP-WYURNTSHIV-NUHFF-NUHFF-NUHFF-ZZZ
6b		1,3-Bis((4-chlorophenyl)thio)bicyclo[1.1.1]pentane	InChI=1S/C17H14Cl2S2/c18-12-1-5-14(6-2-12)20-16-9-17(10-16,11-16)21-15-7-3-13(19)4-8-15/h1-8H,9-11H2	SJOKHIZPCGZHAT-UHFFFAOYSA-N	Long-RInChIKey=SA-FUHFF-ZIXXRXGPBFMPFD-UHFFFAOYSA-N-ZTXSPLGEGCABFL-UHFFFAOYSA-N--SJOKHIZPCGZHAT-UHFFFAOYSA-N-PDIYSPWIMSKCME-UHFFFAOYSA-N--WYURNTSHIVDZCO-UHFFFAOYSA-N	Web-RInChIKey=DGHHQMXOUJLHQEPIH-NUHFFFADPSCTJSA	Short-RInChIKey=SA-FUHFF-AKVGXAMOTL-NNXNECGMTY-WYURNTSHIV-NUHFF-NUHFF-NUHFF-ZZZ
11b		3,3'-Bis((4-chlorophenyl)thio)-1,1'-bi(bicyclo[1.1.1]pentane)	InChI=1S/C22H20Cl2S2/c23-15-1-5-17(6-2-15)25-21-9-19(10-21,11-21)20-12-22(13-20,14-20)26-18-7-3-16(24)4-8-18/h1-8H,9-14H2	PDIYSPWIMSKCME-UHFFFAOYSA-N	Long-RInChIKey=SA-FUHFF-ZIXXRXGPBFMPFD-UHFFFAOYSA-N-ZTXSPLGEGCABFL-UHFFFAOYSA-N--SJOKHIZPCGZHAT-UHFFFAOYSA-N-PDIYSPWIMSKCME-UHFFFAOYSA-N--WYURNTSHIVDZCO-UHFFFAOYSA-N	Web-RInChIKey=DGHHQMXOUJLHQEPIH-NUHFFFADPSCTJSA	Short-RInChIKey=SA-FUHFF-AKVGXAMOTL-NNXNECGMTY-WYURNTSHIV-NUHFF-NUHFF-NUHFF-ZZZ
6c		1,3-Bis((3,5-dichlorophenyl)thio)bicyclo[1.1.1]pentane	InChI=1S/C17H12Cl4S2/c18-10-1-11(19)4-14(3-10)22-16-7-17(8-16,9-16)23-15-5-12(20)2-13(21)6-15/h1-6H,7-9H2	DHAJMGHBXKCZPF-UHFFFAOYSA-N	Long-RInChIKey=SA-FUHFF-JMQANWHMOHXBEA-UHFFFAOYSA-N-ZTXSPLGEGCABFL-UHFFFAOYSA-N--DHAJMGHBXKCZPF-UHFFFAOYSA-N-KGJVMZAWJCTKCI-UHFFFAOYSA-N--WYURNTSHIVDZCO-UHFFFAOYSA-N	Web-RInChIKey=LSZMIAHBQGEAIMIPW-NUHFFFADPSCTJSA	Short-RInChIKey=SA-FUHFF-WHFCBFNDUP-IPOJHZYBCZ-WYURNTSHIV-NUHFF-NUHFF-NUHFF-ZZZ
11c		3,3'-Bis((3,5-dichlorophenyl)thio)-1,1'-bi(bicyclo[1.1.1]pentane)	InChI=1S/C22H18Cl4S2/c23-13-1-14(24)4-17(3-13)27-21-7-19(8-21,9-21)20-10-22(11-20,12-20)28-18-5-15(25)2-16(26)6-18/h1-6H,7-12H2	KGJVMZAWJCTKCI-UHFFFAOYSA-N	Long-RInChIKey=SA-FUHFF-JMQANWHMOHXBEA-UHFFFAOYSA-N-ZTXSPLGEGCABFL-UHFFFAOYSA-N--DHAJMGHBXKCZPF-UHFFFAOYSA-N-KGJVMZAWJCTKCI-UHFFFAOYSA-N--WYURNTSHIVDZCO-UHFFFAOYSA-N	Web-RInChIKey=LSZMIAHBQGEAIMIPW-NUHFFFADPSCTJSA	Short-RInChIKey=SA-FUHFF-WHFCBFNDUP-IPOJHZYBCZ-WYURNTSHIV-NUHFF-NUHFF-NUHFF-ZZZ
6d		1,3-Bis(p-tolylthio)bicyclo[1.1.1]pentane	InChI=1S/C19H20S2/c1-14-3-7-16(8-4-14)20-18-11-19(12-18,13-18)21-17-9-5-15(2)6-10-17/h3-10H,11-13H2,1-2H3	NZNGNSDNZKZZOJ-UHFFFAOYSA-N	Long-RInChIKey=SA-FUHFF-TZOVOULUMXXLOJ-UHFFFAOYSA-N-ZTXSPLGEGCABFL-UHFFFAOYSA-N--NZNGNSDNZKZZOJ-UHFFFAOYSA-N-AUAIDTHVAFAXGQ-UHFFFAOYSA-N--WYURNTSHIVDZCO-UHFFFAOYSA-N	Web-RInChIKey=UODSVRGCZFXJSMPWH-NUHFFFADPSCTJSA	Short-RInChIKey=SA-FUHFF-BNOBYEZAZW-RJKOTIRDIV-WYURNTSHIV-NUHFF-NUHFF-NUHFF-ZZZ
11d		3,3'-Bis(p-tolylthio)-1,1'-bi(bicyclo[1.1.1]pentane)	InChI=1S/C24H26S2/c1-17-3-7-19(8-4-17)25-23-11-21(12-23,13-23)22-14-24(15-22,16-22)26-20-9-5-18(2)6-10-20/h3-10H,11-16H2,1-2H3	AUAIDTHVAFAXGQ-UHFFFAOYSA-N	Long-RInChIKey=SA-FUHFF-TZOVOULUMXXLOJ-UHFFFAOYSA-N-ZTXSPLGEGCABFL-UHFFFAOYSA-N--NZNGNSDNZKZZOJ-UHFFFAOYSA-N-AUAIDTHVAFAXGQ-UHFFFAOYSA-N--WYURNTSHIVDZCO-UHFFFAOYSA-N	Web-RInChIKey=UODSVRGCZFXJSMPWH-NUHFFFADPSCTJSA	Short-RInChIKey=SA-FUHFF-BNOBYEZAZW-RJKOTIRDIV-WYURNTSHIV-NUHFF-NUHFF-NUHFF-ZZZ
13		1,3-bis(benzylthio)bicyclo[1.1.1]pentane	InChI=1S/C19H20S2/c1-3-7-16(8-4-1)11-20-18-13-19(14-18,15-18)21-12-17-9-5-2-6-10-17/h1-10H,11-15H2	GXKYJSRHQMPAPZ-UHFFFAOYSA-N	Long-RInChIKey=SA-FUHFF-GVPWHKZIJBODOX-UHFFFAOYSA-N-ZTXSPLGEGCABFL-UHFFFAOYSA-N--GXKYJSRHQMPAPZ-UHFFFAOYSA-N--WYURNTSHIVDZCO-UHFFFAOYSA-N	Web-RInChIKey=IYXSWLBWCWUUTJPAF-NUHFFFADPSCTJSA	Short-RInChIKey=SA-FUHFF-VWHHADYMEK-GXKYJSRHQM-WYURNTSHIV-NUHFF-NUHFF-NUHFF-ZZZ
6a		1,3-bis(phenylsulfanyl)bicyclo[1.1.1]pentane	InChI=1S/C17H16S2/c1-3-7-14(8-4-1)18-16-11-17(12-16,13-16)19-15-9-5-2-6-10-15/h1-10H,11-13H2	GHXRODNNSAZUSG-UHFFFAOYSA-N	Long-RInChIKey=SA-FUHFF-GUUVPOWQJOLRAS-UHFFFAOYSA-N-PZQGLCGLPMWYBT-UHFFFAOYSA-N-ZTXSPLGEGCABFL-UHFFFAOYSA-N--GHXRODNNSAZUSG-UHFFFAOYSA-N-MMODRWTWUUODQN-UHFFFAOYSA-N-AWYXHOMVLAPYSJ-UHFFFAOYSA-N--WYURNTSHIVDZCO-UHFFFAOYSA-N	Web-RInChIKey=FZFWZZIMEMWMASYBM-NUHFFFADPSCTJSA	Short-RInChIKey=SA-FUHFF-CVVCIRHLXL-MRDPMFJFXN-WYURNTSHIV-NUHFF-NUHFF-NUHFF-ZZZ
16		1-(Phenylthio)-3-(4-methoxyphenylthio)bicyclo[1.1.1]pentane	InChI=1S/C18H18OS2/c1-19-14-7-9-16(10-8-14)21-18-11-17(12-18,13-18)20-15-5-3-2-4-6-15/h2-10H,11-13H2,1H3	MMODRWTWUUODQN-UHFFFAOYSA-N	Long-RInChIKey=SA-FUHFF-GUUVPOWQJOLRAS-UHFFFAOYSA-N-PZQGLCGLPMWYBT-UHFFFAOYSA-N-ZTXSPLGEGCABFL-UHFFFAOYSA-N--GHXRODNNSAZUSG-UHFFFAOYSA-N-MMODRWTWUUODQN-UHFFFAOYSA-N-AWYXHOMVLAPYSJ-UHFFFAOYSA-N--WYURNTSHIVDZCO-UHFFFAOYSA-N	Web-RInChIKey=FZFWZZIMEMWMASYBM-NUHFFFADPSCTJSA	Short-RInChIKey=SA-FUHFF-CVVCIRHLXL-MRDPMFJFXN-WYURNTSHIV-NUHFF-NUHFF-NUHFF-ZZZ
6e		1,3-Bis((4-methoxyphenyl)thio)bicyclo[1.1.1]pentane	InChI=1S/C19H20O2S2/c1-20-14-3-7-16(8-4-14)22-18-11-19(12-18,13-18)23-17-9-5-15(21-2)6-10-17/h3-10H,11-13H2,1-2H3	AWYXHOMVLAPYSJ-UHFFFAOYSA-N	Long-RInChIKey=SA-FUHFF-GUUVPOWQJOLRAS-UHFFFAOYSA-N-PZQGLCGLPMWYBT-UHFFFAOYSA-N-ZTXSPLGEGCABFL-UHFFFAOYSA-N--GHXRODNNSAZUSG-UHFFFAOYSA-N-MMODRWTWUUODQN-UHFFFAOYSA-N-AWYXHOMVLAPYSJ-UHFFFAOYSA-N--WYURNTSHIVDZCO-UHFFFAOYSA-N	Web-RInChIKey=FZFWZZIMEMWMASYBM-NUHFFFADPSCTJSA	Short-RInChIKey=SA-FUHFF-CVVCIRHLXL-MRDPMFJFXN-WYURNTSHIV-NUHFF-NUHFF-NUHFF-ZZZ
6a		1,3-bis(phenylsulfanyl)bicyclo[1.1.1]pentane	InChI=1S/C17H16S2/c1-3-7-14(8-4-1)18-16-11-17(12-16,13-16)19-15-9-5-2-6-10-15/h1-10H,11-13H2	GHXRODNNSAZUSG-UHFFFAOYSA-N	Long-RInChIKey=SA-FUHFF-GUUVPOWQJOLRAS-UHFFFAOYSA-N-TZOVOULUMXXLOJ-UHFFFAOYSA-N-ZTXSPLGEGCABFL-UHFFFAOYSA-N--GHXRODNNSAZUSG-UHFFFAOYSA-N-DWANMFCYEOMCOA-UHFFFAOYSA-N-NZNGNSDNZKZZOJ-UHFFFAOYSA-N--WYURNTSHIVDZCO-UHFFFAOYSA-N	Web-RInChIKey=IWTTXUPEZISEMKLUZ-NUHFFFADPSCTJSA	Short-RInChIKey=SA-FUHFF-DTEONBUPJW-USTASXYEIS-WYURNTSHIV-NUHFF-NUHFF-NUHFF-ZZZ
15		1-(Phenylthio)-3-(p-phenylthio)bicyclo[1.1.1]pentane	InChI=1S/C18H18S2/c1-14-7-9-16(10-8-14)20-18-11-17(12-18,13-18)19-15-5-3-2-4-6-15/h2-10H,11-13H2,1H3	DWANMFCYEOMCOA-UHFFFAOYSA-N	Long-RInChIKey=SA-FUHFF-GUUVPOWQJOLRAS-UHFFFAOYSA-N-TZOVOULUMXXLOJ-UHFFFAOYSA-N-ZTXSPLGEGCABFL-UHFFFAOYSA-N--GHXRODNNSAZUSG-UHFFFAOYSA-N-DWANMFCYEOMCOA-UHFFFAOYSA-N-NZNGNSDNZKZZOJ-UHFFFAOYSA-N--WYURNTSHIVDZCO-UHFFFAOYSA-N	Web-RInChIKey=IWTTXUPEZISEMKLUZ-NUHFFFADPSCTJSA	Short-RInChIKey=SA-FUHFF-DTEONBUPJW-USTASXYEIS-WYURNTSHIV-NUHFF-NUHFF-NUHFF-ZZZ
6d		1,3-Bis(p-tolylthio)bicyclo[1.1.1]pentane	InChI=1S/C19H20S2/c1-14-3-7-16(8-4-14)20-18-11-19(12-18,13-18)21-17-9-5-15(2)6-10-17/h3-10H,11-13H2,1-2H3	NZNGNSDNZKZZOJ-UHFFFAOYSA-N	Long-RInChIKey=SA-FUHFF-GUUVPOWQJOLRAS-UHFFFAOYSA-N-TZOVOULUMXXLOJ-UHFFFAOYSA-N-ZTXSPLGEGCABFL-UHFFFAOYSA-N--GHXRODNNSAZUSG-UHFFFAOYSA-N-DWANMFCYEOMCOA-UHFFFAOYSA-N-NZNGNSDNZKZZOJ-UHFFFAOYSA-N--WYURNTSHIVDZCO-UHFFFAOYSA-N	Web-RInChIKey=IWTTXUPEZISEMKLUZ-NUHFFFADPSCTJSA	Short-RInChIKey=SA-FUHFF-DTEONBUPJW-USTASXYEIS-WYURNTSHIV-NUHFF-NUHFF-NUHFF-ZZZ
