# Supplementary material for: Insertion of [1.1.1]propellane into aromatic disulfides
Source: Beilstein J Org Chem. 2019 May 28;15:1172–80. doi: 10.3762/bjoc.15.114 (PMC6604700; doi:10.3762/bjoc.15.114)
Supplement: File 4 — DOIs data repository. [file Beilstein_J_Org_Chem-15-1172-s004.xlsx]

## Sheet: Repository Report DOI List
Article Reference			Article DOI
Beilstein J. Org. Chem. 2019, 15, 1172–1180			doi:10.3762/bjoc.15.114
Label	Type	Image	DOI
	Reaction		https://dx.doi.org/10.14272/reaction/SA-FUHFF-UHFFFADPSC-AXGWEHWIGI-UHFFFADPSC-NUHFF-NUHFF-NUHFF-ZZZ
5a	Sample		https://dx.doi.org/10.14272/AXGWEHWIGICNLX-UHFFFAOYSA-N.1
	Analysis		https://dx.doi.org/10.14272/AXGWEHWIGICNLX-UHFFFAOYSA-N/13CNMR
	Analysis		https://dx.doi.org/10.14272/AXGWEHWIGICNLX-UHFFFAOYSA-N/1HNMR
	Reaction		https://dx.doi.org/10.14272/reaction/SA-FUHFF-UHFFFADPSC-GHXRODNNSA-UHFFFADPSC-NUHFF-NUHFF-NUHFF-ZZZ
6a	Sample		https://dx.doi.org/10.14272/GHXRODNNSAZUSG-UHFFFAOYSA-N.1
	Analysis		https://dx.doi.org/10.14272/GHXRODNNSAZUSG-UHFFFAOYSA-N/IR
	Analysis		https://dx.doi.org/10.14272/GHXRODNNSAZUSG-UHFFFAOYSA-N/Mass.1
	Analysis		https://dx.doi.org/10.14272/GHXRODNNSAZUSG-UHFFFAOYSA-N/13CNMR
	Analysis		https://dx.doi.org/10.14272/GHXRODNNSAZUSG-UHFFFAOYSA-N/1HNMR
	Analysis		https://dx.doi.org/10.14272/GHXRODNNSAZUSG-UHFFFAOYSA-N/Mass
	Reaction		https://dx.doi.org/10.14272/reaction/SA-FUHFF-UHFFFADPSC-SJOKHIZPCG-UHFFFADPSC-NUHFF-NUHFF-NUHFF-ZZZ
6b	Sample		https://dx.doi.org/10.14272/SJOKHIZPCGZHAT-UHFFFAOYSA-N.1
	Analysis		https://dx.doi.org/10.14272/SJOKHIZPCGZHAT-UHFFFAOYSA-N/IR
	Analysis		https://dx.doi.org/10.14272/SJOKHIZPCGZHAT-UHFFFAOYSA-N/1HNMR
	Analysis		https://dx.doi.org/10.14272/SJOKHIZPCGZHAT-UHFFFAOYSA-N/Mass
	Analysis		https://dx.doi.org/10.14272/SJOKHIZPCGZHAT-UHFFFAOYSA-N/Mass.1
	Analysis		https://dx.doi.org/10.14272/https://dx.doi.org/10.14272/SJOKHIZPCGZHAT-UHFFFAOYSA-N/13CNMR
	Reaction		https://dx.doi.org/10.14272/reaction/SA-FUHFF-UHFFFADPSC-DHAJMGHBXK-UHFFFADPSC-NUHFF-NUHFF-NUHFF-ZZZ
6c	Sample		https://dx.doi.org/10.14272/DHAJMGHBXKCZPF-UHFFFAOYSA-N.1
	Analysis		https://dx.doi.org/10.14272/DHAJMGHBXKCZPF-UHFFFAOYSA-N/Mass.1
	Analysis		https://dx.doi.org/10.14272/DHAJMGHBXKCZPF-UHFFFAOYSA-N/IR
	Analysis		https://dx.doi.org/10.14272/DHAJMGHBXKCZPF-UHFFFAOYSA-N/1HNMR
	Analysis		https://dx.doi.org/10.14272/DHAJMGHBXKCZPF-UHFFFAOYSA-N/13CNMR
	Analysis		https://dx.doi.org/10.14272/DHAJMGHBXKCZPF-UHFFFAOYSA-N/Mass
	Reaction		https://dx.doi.org/10.14272/reaction/SA-FUHFF-UHFFFADPSC-NZNGNSDNZK-UHFFFADPSC-NUHFF-NUHFF-NUHFF-ZZZ
6d	Sample		https://dx.doi.org/10.14272/NZNGNSDNZKZZOJ-UHFFFAOYSA-N.1
	Analysis		https://dx.doi.org/10.14272/NZNGNSDNZKZZOJ-UHFFFAOYSA-N/13CNMR
	Analysis		https://dx.doi.org/10.14272/NZNGNSDNZKZZOJ-UHFFFAOYSA-N/IR
	Analysis		https://dx.doi.org/10.14272/NZNGNSDNZKZZOJ-UHFFFAOYSA-N/Mass.1
	Analysis		https://dx.doi.org/10.14272/NZNGNSDNZKZZOJ-UHFFFAOYSA-N/1HNMR
	Analysis		https://dx.doi.org/10.14272/NZNGNSDNZKZZOJ-UHFFFAOYSA-N/Mass
	Reaction		https://dx.doi.org/10.14272/reaction/SA-FUHFF-UHFFFADPSC-AWYXHOMVLA-UHFFFADPSC-NUHFF-NUHFF-NUHFF-ZZZ
6e	Sample		https://dx.doi.org/10.14272/AWYXHOMVLAPYSJ-UHFFFAOYSA-N.1
	Analysis		https://dx.doi.org/10.14272/AWYXHOMVLAPYSJ-UHFFFAOYSA-N/1HNMR
	Analysis		https://dx.doi.org/10.14272/AWYXHOMVLAPYSJ-UHFFFAOYSA-N/Mass.1
	Analysis		https://dx.doi.org/10.14272/AWYXHOMVLAPYSJ-UHFFFAOYSA-N/13CNMR
	Analysis		https://dx.doi.org/10.14272/AWYXHOMVLAPYSJ-UHFFFAOYSA-N/Mass
	Analysis		https://dx.doi.org/10.14272/AWYXHOMVLAPYSJ-UHFFFAOYSA-N/IR
	Reaction		https://dx.doi.org/10.14272/reaction/SA-FUHFF-UHFFFADPSC-QFUYDAGNUJ-UHFFFADPSC-NUHFF-NUHFF-NUHFF-ZZZ
17	Sample		https://dx.doi.org/10.14272/QFUYDAGNUJWBSM-UHFFFAOYSA-N.1
	Analysis		https://dx.doi.org/10.14272/QFUYDAGNUJWBSM-UHFFFAOYSA-N/1HNMR
	Analysis		https://dx.doi.org/10.14272/QFUYDAGNUJWBSM-UHFFFAOYSA-N/13CNMR
	Reaction		https://dx.doi.org/10.14272/reaction/SA-FUHFF-UHFFFADPSC-JKPTZWVDCS-UHFFFADPSC-NUHFF-NUHFF-NUHFF-ZZZ
10f	Sample		https://dx.doi.org/10.14272/JKPTZWVDCSARTM-UHFFFAOYSA-N.1
	Analysis		https://dx.doi.org/10.14272/JKPTZWVDCSARTM-UHFFFAOYSA-N/13CNMR
	Analysis		https://dx.doi.org/10.14272/JKPTZWVDCSARTM-UHFFFAOYSA-N/1HNMR
	Reaction		https://dx.doi.org/10.14272/reaction/SA-FUHFF-UHFFFADPSC-PINRSYZIAI-UHFFFADPSC-NUHFF-NUHFF-NUHFF-ZZZ
6f	Sample		https://dx.doi.org/10.14272/PINRSYZIAIUFQE-UHFFFAOYSA-N.1
	Analysis		https://dx.doi.org/10.14272/PINRSYZIAIUFQE-UHFFFAOYSA-N/IR
	Analysis		https://dx.doi.org/10.14272/PINRSYZIAIUFQE-UHFFFAOYSA-N/Mass.1
	Analysis		https://dx.doi.org/10.14272/PINRSYZIAIUFQE-UHFFFAOYSA-N/Mass
	Analysis		https://dx.doi.org/10.14272/PINRSYZIAIUFQE-UHFFFAOYSA-N/13CNMR
	Analysis		https://dx.doi.org/10.14272/PINRSYZIAIUFQE-UHFFFAOYSA-N/1HNMR
	Reaction		https://dx.doi.org/10.14272/reaction/SA-FUHFF-UHFFFADPSC-HQLMMCQLNP-UHFFFADPSC-NUHFF-NUHFF-NUHFF-ZZZ
6a	Sample		https://dx.doi.org/10.14272/GHXRODNNSAZUSG-UHFFFAOYSA-N.2
	Analysis		https://dx.doi.org/10.14272/GHXRODNNSAZUSG-UHFFFAOYSA-N/1HNMR.1
11a	Sample		https://dx.doi.org/10.14272/UFJZAHXFSRPBMA-UHFFFAOYSA-N.1
	Analysis		https://dx.doi.org/10.14272/UFJZAHXFSRPBMA-UHFFFAOYSA-N/IR
	Analysis		https://dx.doi.org/10.14272/UFJZAHXFSRPBMA-UHFFFAOYSA-N/Mass
	Analysis		https://dx.doi.org/10.14272/UFJZAHXFSRPBMA-UHFFFAOYSA-N/13CNMR
	Analysis		https://dx.doi.org/10.14272/UFJZAHXFSRPBMA-UHFFFAOYSA-N/Mass.1
	Analysis		https://dx.doi.org/10.14272/UFJZAHXFSRPBMA-UHFFFAOYSA-N/1HNMR
	Reaction		https://dx.doi.org/10.14272/reaction/SA-FUHFF-UHFFFADPSC-NNXNECGMTY-UHFFFADPSC-NUHFF-NUHFF-NUHFF-ZZZ
6b	Sample		https://dx.doi.org/10.14272/SJOKHIZPCGZHAT-UHFFFAOYSA-N.2
	Analysis		https://dx.doi.org/10.14272/SJOKHIZPCGZHAT-UHFFFAOYSA-N/1HNMR.1
11b	Sample		https://dx.doi.org/10.14272/PDIYSPWIMSKCME-UHFFFAOYSA-N.1
	Analysis		https://dx.doi.org/10.14272/https://dx.doi.org/10.14272/PDIYSPWIMSKCME-UHFFFAOYSA-N/Mass
	Analysis		https://dx.doi.org/10.14272/PDIYSPWIMSKCME-UHFFFAOYSA-N/IR
	Analysis		https://dx.doi.org/10.14272/PDIYSPWIMSKCME-UHFFFAOYSA-N/1HNMR
	Analysis		https://dx.doi.org/10.14272/PDIYSPWIMSKCME-UHFFFAOYSA-N/13CNMR
	Analysis		https://dx.doi.org/10.14272/PDIYSPWIMSKCME-UHFFFAOYSA-N/Mass.1
	Reaction		https://dx.doi.org/10.14272/reaction/SA-FUHFF-UHFFFADPSC-IPOJHZYBCZ-UHFFFADPSC-NUHFF-NUHFF-NUHFF-ZZZ
6c	Sample		https://dx.doi.org/10.14272/DHAJMGHBXKCZPF-UHFFFAOYSA-N.2
	Analysis		https://dx.doi.org/10.14272/DHAJMGHBXKCZPF-UHFFFAOYSA-N/1HNMR.1
11c	Sample		https://dx.doi.org/10.14272/KGJVMZAWJCTKCI-UHFFFAOYSA-N.1
	Analysis		https://dx.doi.org/10.14272/KGJVMZAWJCTKCI-UHFFFAOYSA-N/IR
	Analysis		https://dx.doi.org/10.14272/KGJVMZAWJCTKCI-UHFFFAOYSA-N/Mass
	Analysis		https://dx.doi.org/10.14272/KGJVMZAWJCTKCI-UHFFFAOYSA-N/1HNMR
	Analysis		https://dx.doi.org/10.14272/KGJVMZAWJCTKCI-UHFFFAOYSA-N/Mass.1
	Analysis		https://dx.doi.org/10.14272/KGJVMZAWJCTKCI-UHFFFAOYSA-N/13CNMR
	Reaction		https://dx.doi.org/10.14272/reaction/SA-FUHFF-UHFFFADPSC-RJKOTIRDIV-UHFFFADPSC-NUHFF-NUHFF-NUHFF-ZZZ
6d	Sample		https://dx.doi.org/10.14272/NZNGNSDNZKZZOJ-UHFFFAOYSA-N.2
	Analysis		https://dx.doi.org/10.14272/NZNGNSDNZKZZOJ-UHFFFAOYSA-N/1HNMR.1
11d	Sample		https://dx.doi.org/10.14272/AUAIDTHVAFAXGQ-UHFFFAOYSA-N.1
	Analysis		https://dx.doi.org/10.14272/AUAIDTHVAFAXGQ-UHFFFAOYSA-N/IR
	Analysis		https://dx.doi.org/10.14272/AUAIDTHVAFAXGQ-UHFFFAOYSA-N/1HNMR
	Analysis		https://dx.doi.org/10.14272/AUAIDTHVAFAXGQ-UHFFFAOYSA-N/13CNMR
	Analysis		https://dx.doi.org/10.14272/AUAIDTHVAFAXGQ-UHFFFAOYSA-N/Mass
	Analysis		https://dx.doi.org/10.14272/AUAIDTHVAFAXGQ-UHFFFAOYSA-N/Mass.1
	Reaction		https://dx.doi.org/10.14272/reaction/SA-FUHFF-UHFFFADPSC-GXKYJSRHQM-UHFFFADPSC-NUHFF-NUHFF-NUHFF-ZZZ
13	Sample		https://dx.doi.org/10.14272/GXKYJSRHQMPAPZ-UHFFFAOYSA-N.1
	Analysis		https://dx.doi.org/10.14272/GXKYJSRHQMPAPZ-UHFFFAOYSA-N/13CNMR
	Analysis		https://dx.doi.org/10.14272/GXKYJSRHQMPAPZ-UHFFFAOYSA-N/IR
	Analysis		https://dx.doi.org/10.14272/GXKYJSRHQMPAPZ-UHFFFAOYSA-N/Mass
	Analysis		https://dx.doi.org/10.14272/GXKYJSRHQMPAPZ-UHFFFAOYSA-N/Mass.1
	Analysis		https://dx.doi.org/10.14272/GXKYJSRHQMPAPZ-UHFFFAOYSA-N/1HNMR
14	Sample		https://dx.doi.org/10.14272/IPSCQEYBZPKANH-UHFFFAOYSA-N.1
	Analysis		https://dx.doi.org/10.14272/IPSCQEYBZPKANH-UHFFFAOYSA-N/Crystall-Structure
	Reaction		https://dx.doi.org/10.14272/reaction/SA-FUHFF-UHFFFADPSC-MRDPMFJFXN-UHFFFADPSC-NUHFF-NUHFF-NUHFF-ZZZ
6e	Sample		https://dx.doi.org/10.14272/AWYXHOMVLAPYSJ-UHFFFAOYSA-N.2
	Analysis		https://dx.doi.org/10.14272/AWYXHOMVLAPYSJ-UHFFFAOYSA-N/1HNMR.1
16	Sample		https://dx.doi.org/10.14272/MMODRWTWUUODQN-UHFFFAOYSA-N.1
	Analysis		https://dx.doi.org/10.14272/MMODRWTWUUODQN-UHFFFAOYSA-N/Mass.1
	Analysis		https://dx.doi.org/10.14272/MMODRWTWUUODQN-UHFFFAOYSA-N/1HNMR
	Analysis		https://dx.doi.org/10.14272/MMODRWTWUUODQN-UHFFFAOYSA-N/13CNMR
	Analysis		https://dx.doi.org/10.14272/MMODRWTWUUODQN-UHFFFAOYSA-N/IR
	Analysis		https://dx.doi.org/10.14272/MMODRWTWUUODQN-UHFFFAOYSA-N/Mass
	Analysis		https://dx.doi.org/10.14272/MMODRWTWUUODQN-UHFFFAOYSA-N/Crystal-Structure
6a	Sample		https://dx.doi.org/10.14272/GHXRODNNSAZUSG-UHFFFAOYSA-N.3
	Analysis		https://dx.doi.org/10.14272/GHXRODNNSAZUSG-UHFFFAOYSA-N/1HNMR.2
	Reaction		https://dx.doi.org/10.14272/reaction/SA-FUHFF-UHFFFADPSC-USTASXYEIS-UHFFFADPSC-NUHFF-NUHFF-NUHFF-ZZZ
6a	Sample		https://dx.doi.org/10.14272/GHXRODNNSAZUSG-UHFFFAOYSA-N.5
	Analysis		https://dx.doi.org/10.14272/GHXRODNNSAZUSG-UHFFFAOYSA-N/1HNMR.3
6d	Sample		https://dx.doi.org/10.14272/NZNGNSDNZKZZOJ-UHFFFAOYSA-N.3
	Analysis		https://dx.doi.org/10.14272/NZNGNSDNZKZZOJ-UHFFFAOYSA-N/1HNMR.2
15	Sample		https://dx.doi.org/10.14272/DWANMFCYEOMCOA-UHFFFAOYSA-N.1
	Analysis		https://dx.doi.org/10.14272/DWANMFCYEOMCOA-UHFFFAOYSA-N/1HNMR
	Analysis		https://dx.doi.org/10.14272/DWANMFCYEOMCOA-UHFFFAOYSA-N/Mass.1
	Analysis		https://dx.doi.org/10.14272/DWANMFCYEOMCOA-UHFFFAOYSA-N/Mass
	Analysis		https://dx.doi.org/10.14272/DWANMFCYEOMCOA-UHFFFAOYSA-N/IR
	Analysis		https://dx.doi.org/10.14272/DWANMFCYEOMCOA-UHFFFAOYSA-N/13CNMR
