# Supplementary material for: Insertion of [1.1.1]propellane into aromatic disulfides
Source: Beilstein J Org Chem. 2019 May 28;15:1172–80. doi: 10.3762/bjoc.15.114 (PMC6604700; doi:10.3762/bjoc.15.114)
Supplement: File 5 — Reference samples molecule archive. [file Beilstein_J_Org_Chem-15-1172-s005.xlsx]

## Sheet: ELN Report Reaction List
contact	nicole.jung@kit.edu	Hermann-von-Helmholz Platz 1, 76344 Eggenstein-Leopoldshafen	Molecule Archive
	stefan.braese@kit.edu
Article Reference					Article DOI
reference: Beilstein J. Org. Chem. 2019, 15, 1172–1180					doi:10.3762/bjoc.15.114
Label	Image	Name	InChI	InChIKey	Reference number Molecule Archive
5a		1-(phenylthio)bicyclo[1.1.1]pentane	InChI=1S/C11H12S/c1-2-4-10(5-3-1)12-11-6-9(7-11)8-11/h1-5,9H,6-8H2	AXGWEHWIGICNLX-UHFFFAOYSA-N	X6538
6a		1,3-bis(phenylthio)bicyclo[1.1.1]pentane	InChI=1S/C17H16S2/c1-3-7-14(8-4-1)18-16-11-17(12-16,13-16)19-15-9-5-2-6-10-15/h1-10H,11-13H2	GHXRODNNSAZUSG-UHFFFAOYSA-N	X9950
6b		1,3-Bis((4-chlorophenyl)thio)bicyclo[1.1.1]pentane	InChI=1S/C17H14Cl2S2/c18-12-1-5-14(6-2-12)20-16-9-17(10-16,11-16)21-15-7-3-13(19)4-8-15/h1-8H,9-11H2	SJOKHIZPCGZHAT-UHFFFAOYSA-N	X10673
6c		1,3-Bis((3,5-dichlorophenyl)thio)bicyclo[1.1.1]pentane	InChI=1S/C17H12Cl4S2/c18-10-1-11(19)4-14(3-10)22-16-7-17(8-16,9-16)23-15-5-12(20)2-13(21)6-15/h1-6H,7-9H2	DHAJMGHBXKCZPF-UHFFFAOYSA-N	X10691
6d		1,3-Bis(p-tolylthio)bicyclo[1.1.1]pentane	InChI=1S/C19H20S2/c1-14-3-7-16(8-4-14)20-18-11-19(12-18,13-18)21-17-9-5-15(2)6-10-17/h3-10H,11-13H2,1-2H3	NZNGNSDNZKZZOJ-UHFFFAOYSA-N	X10768
6e		1,3-Bis((4-methoxyphenyl)thio)bicyclo[1.1.1]pentane	InChI=1S/C19H20O2S2/c1-20-14-3-7-16(8-4-14)22-18-11-19(12-18,13-18)23-17-9-5-15(21-2)6-10-17/h3-10H,11-13H2,1-2H3	AWYXHOMVLAPYSJ-UHFFFAOYSA-N	X11933
17		1-Iodo-2-phenylbenzene	InChI=1S/C12H9I/c13-12-9-5-4-8-11(12)10-6-2-1-3-7-10/h1-9H	QFUYDAGNUJWBSM-UHFFFAOYSA-N	X11588
10f		1-Phenyl-2-[(2-phenylphenyl)disulfanyl]benzene	InChI=1S/C24H18S2/c1-3-11-19(12-4-1)21-15-7-9-17-23(21)25-26-24-18-10-8-16-22(24)20-13-5-2-6-14-20/h1-18H	JKPTZWVDCSARTM-UHFFFAOYSA-N	X11528
6f		1,3-Bis([1,1'-biphenyl]-2-ylthio)bicyclo[1.1.1]pentane	InChI=1S/C29H24S2/c1-3-11-22(12-4-1)24-15-7-9-17-26(24)30-28-19-29(20-28,21-28)31-27-18-10-8-16-25(27)23-13-5-2-6-14-23/h1-18H,19-21H2	PINRSYZIAIUFQE-UHFFFAOYSA-N	X11926
11a		3,3'-Bis(phenylthio)-1,1'-bi(bicyclo[1.1.1]pentane)	InChI=1S/C22H22S2/c1-3-7-17(8-4-1)23-21-11-19(12-21,13-21)20-14-22(15-20,16-20)24-18-9-5-2-6-10-18/h1-10H,11-16H2	UFJZAHXFSRPBMA-UHFFFAOYSA-N	X11919
11b		3,3'-Bis((4-chlorophenyl)thio)-1,1'-bi(bicyclo[1.1.1]pentane)	InChI=1S/C22H20Cl2S2/c23-15-1-5-17(6-2-15)25-21-9-19(10-21,11-21)20-12-22(13-20,14-20)26-18-7-3-16(24)4-8-18/h1-8H,9-14H2	PDIYSPWIMSKCME-UHFFFAOYSA-N	X11988
11c		3,3'-Bis((3,5-dichlorophenyl)thio)-1,1'-bi(bicyclo[1.1.1]pentane)	InChI=1S/C22H18Cl4S2/c23-13-1-14(24)4-17(3-13)27-21-7-19(8-21,9-21)20-10-22(11-20,12-20)28-18-5-15(25)2-16(26)6-18/h1-6H,7-12H2	KGJVMZAWJCTKCI-UHFFFAOYSA-N	X9981
11d		3,3'-Bis(p-tolylthio)-1,1'-bi(bicyclo[1.1.1]pentane)	InChI=1S/C24H26S2/c1-17-3-7-19(8-4-17)25-23-11-21(12-23,13-23)22-14-24(15-22,16-22)26-20-9-5-18(2)6-10-20/h3-10H,11-16H2,1-2H3	AUAIDTHVAFAXGQ-UHFFFAOYSA-N	X11995
13		1,3-bis(benzylthio)bicyclo[1.1.1]pentane	InChI=1S/C19H20S2/c1-3-7-16(8-4-1)11-20-18-13-19(14-18,15-18)21-12-17-9-5-2-6-10-17/h1-10H,11-15H2	GXKYJSRHQMPAPZ-UHFFFAOYSA-N	X11769
15		1-(Phenylthio)-3-(p-phenylthio)bicyclo[1.1.1]pentane	InChI=1S/C18H18S2/c1-14-7-9-16(10-8-14)20-18-11-17(12-18,13-18)19-15-5-3-2-4-6-15/h2-10H,11-13H2,1H3	DWANMFCYEOMCOA-UHFFFAOYSA-N	X11963
16		1-(Phenylthio)-3-(4-methoxyphenylthio)bicyclo[1.1.1]pentane	InChI=1S/C18H18OS2/c1-19-14-7-9-16(10-8-14)21-18-11-17(12-18,13-18)20-15-5-3-2-4-6-15/h2-10H,11-13H2,1H3	MMODRWTWUUODQN-UHFFFAOYSA-N	X11987
